# Supplementary material for: Synthesis of benzo[d]thiazole-hydrazone analogues: molecular docking and SAR studies of potential H+/K+ATPase inhibitors and anti-inflammatory agents
Source: Royal Society of Chemistry journal article supplement (doi:10.1039/c7md00111h), 2017-01-01
Supplement: c7md00111h1.pdf [file c7md00111h1.pdf]

## **Synthesis of benzo[d]thiazole-hydrazone analogues: Molecular docking and SAR studies of potential H<sup>+</sup>/K<sup>+</sup>-ATPase inhibitors and anti-inflammatory agents**

**Shi-Meng Wang<sup>1</sup>, Gao-Feng Zha<sup>1</sup>, K. P. Rakesh<sup>1\*</sup>, N. Darshini<sup>2</sup>, T. Shubhavathi<sup>2</sup>, H. K. Vivek<sup>3</sup>, N. Mallesha<sup>2\*</sup> and Hua-Li Qin<sup>1\*</sup>**

<sup>1</sup>School of Chemistry, Department of Pharmaceutical Engineering, Chemical Engineering and Life Science, Wuhan University of Technology, 205 Luoshi Road, Wuhan, 430073, PR China

<sup>2</sup> SRI RAM CHEM, R & D Centre, Plot No. 31, JCK Industrial Park, Belagola Industrial Area, Mysore 570016, Karnataka, India

<sup>3</sup>Department of Biotechnology, Sri Jayachamarajendra College of Engineering, Mysuru-570006, Karnataka, India

### **Corresponding authors**

\*Email: rakeshasg@gmail.com

\*Email: research@sriramchem.com

Tel.: +91-821-4255588

\*Email: qinhuali@whut.edu.cn

Fax: +86 27 87749300.

**<sup>1</sup>H , <sup>13</sup>C and mass spectra of synthesized compounds**

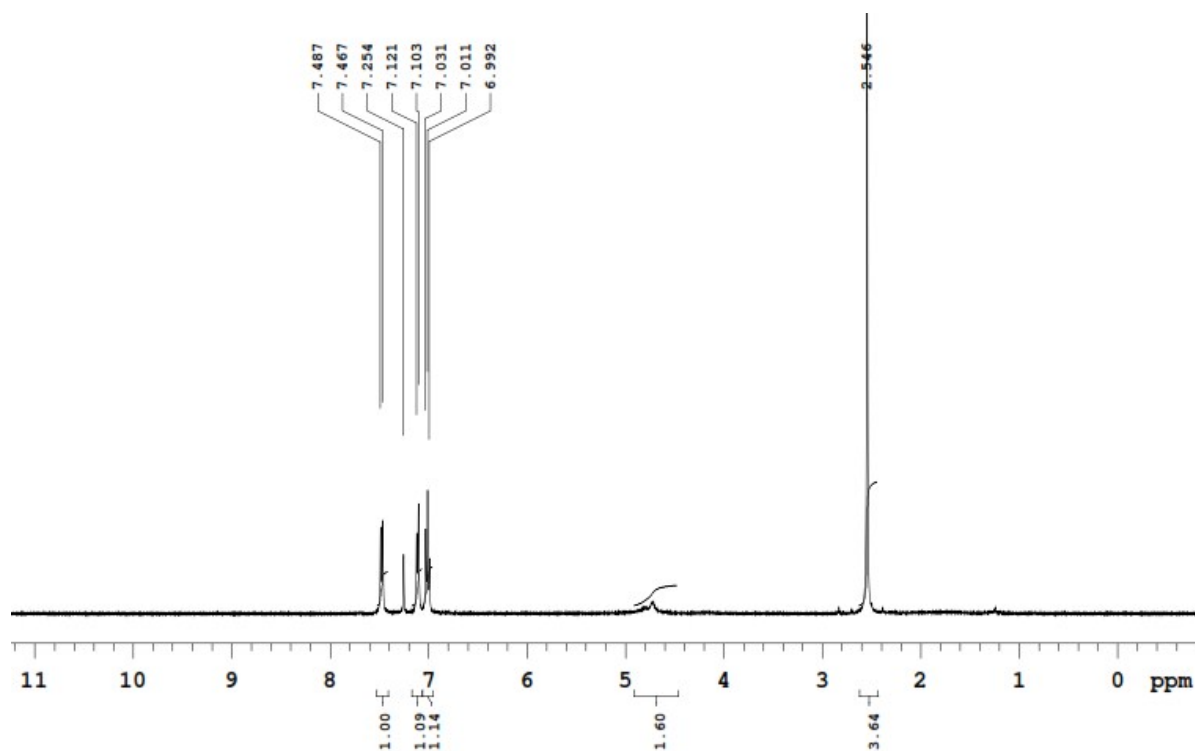

<sup>1</sup>H NMR spectra of compound no B

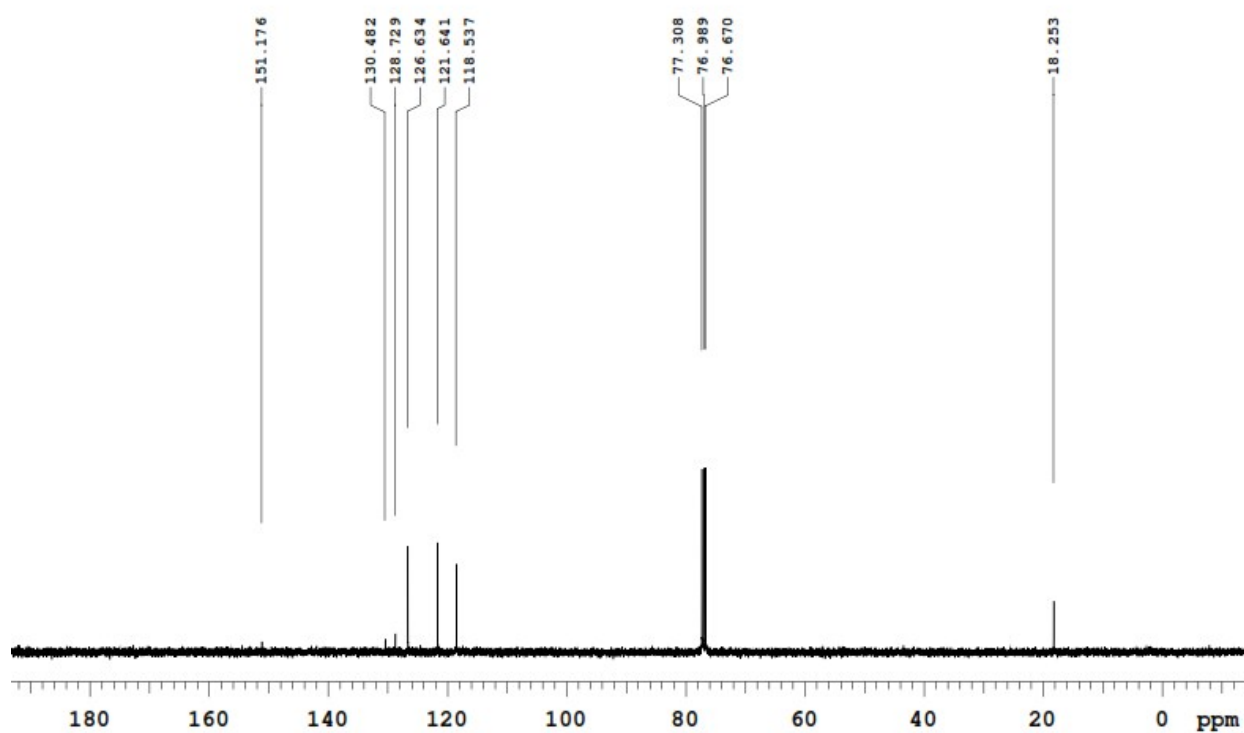

<sup>13</sup>C NMR spectra of compound no B

1701004-Het 95 (1.639)

TOF MS ES+  
4.54e1

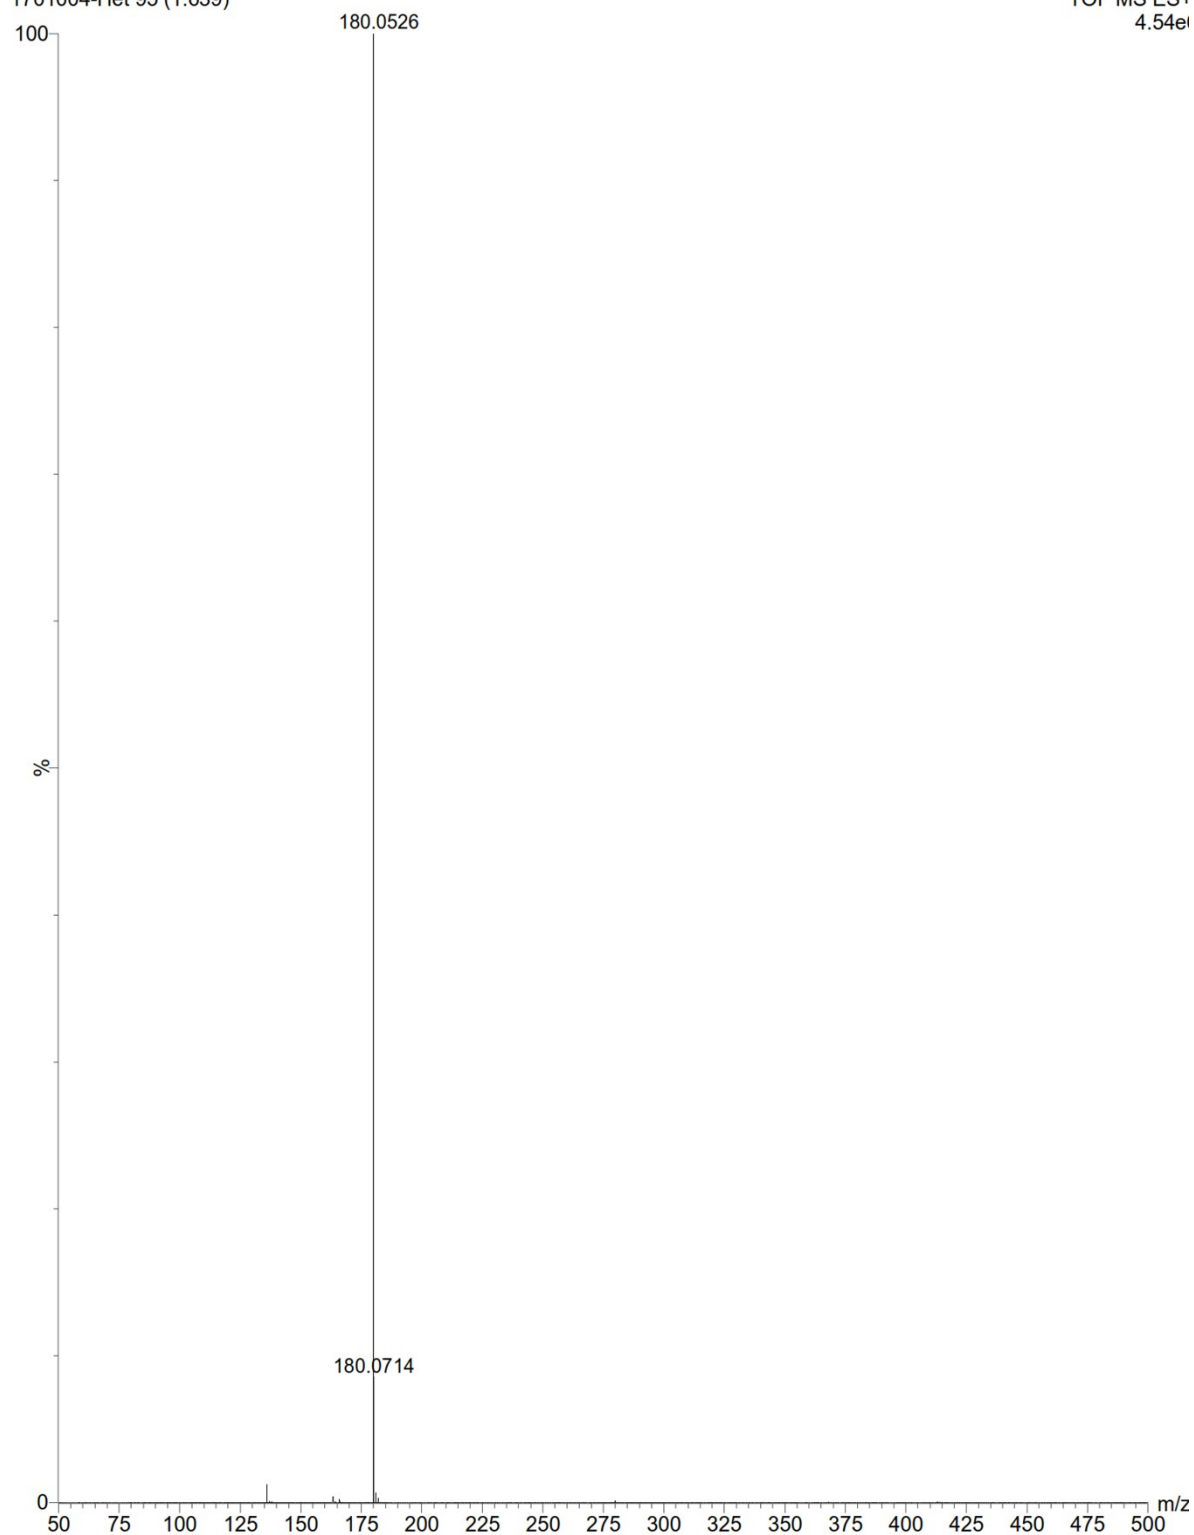

Mass spectra of compound no B

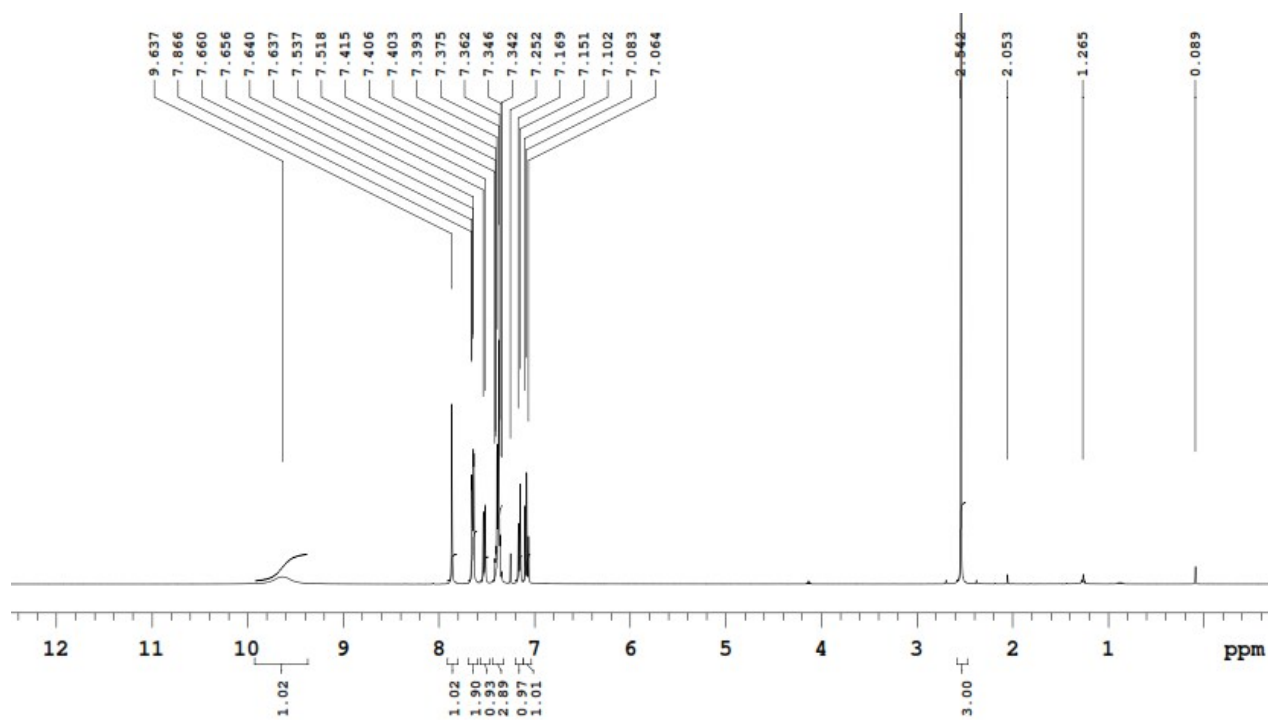

**<sup>1</sup>H NMR spectra of compound no 1**

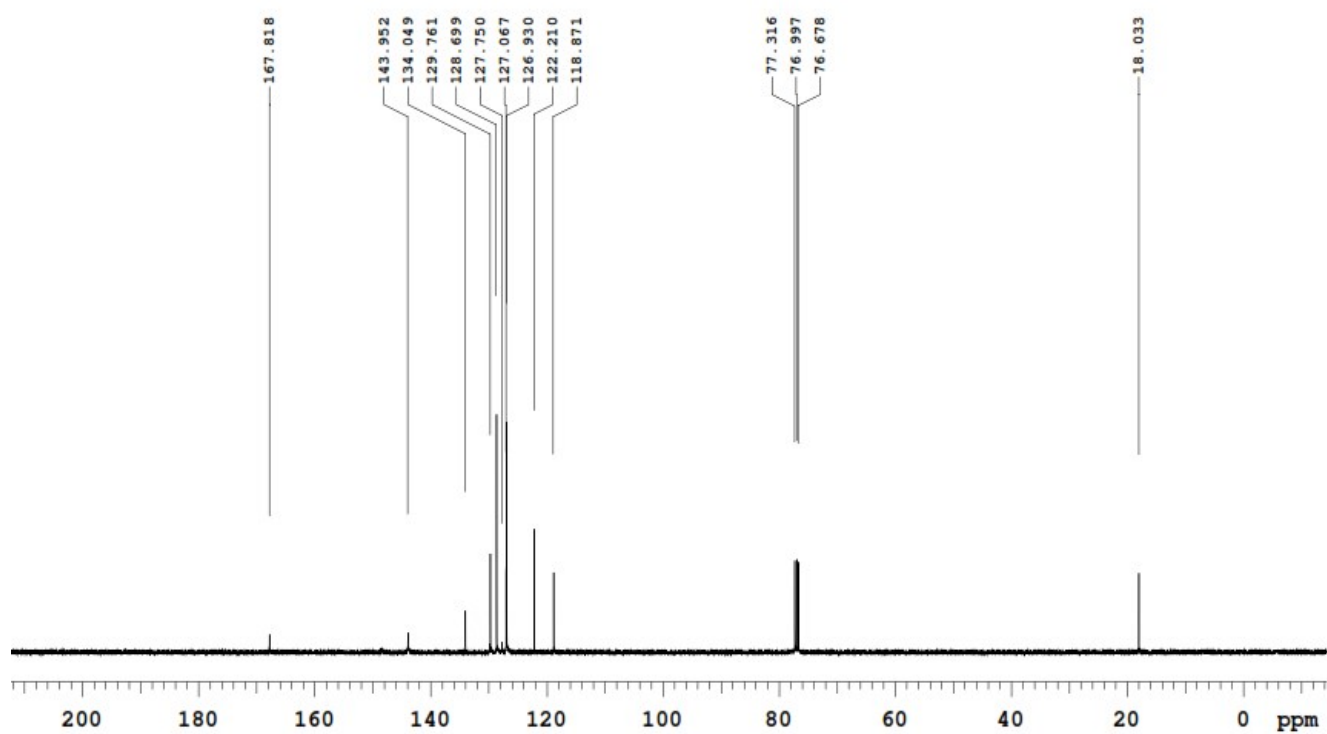

**<sup>13</sup>C NMR spectra of compound no 1**

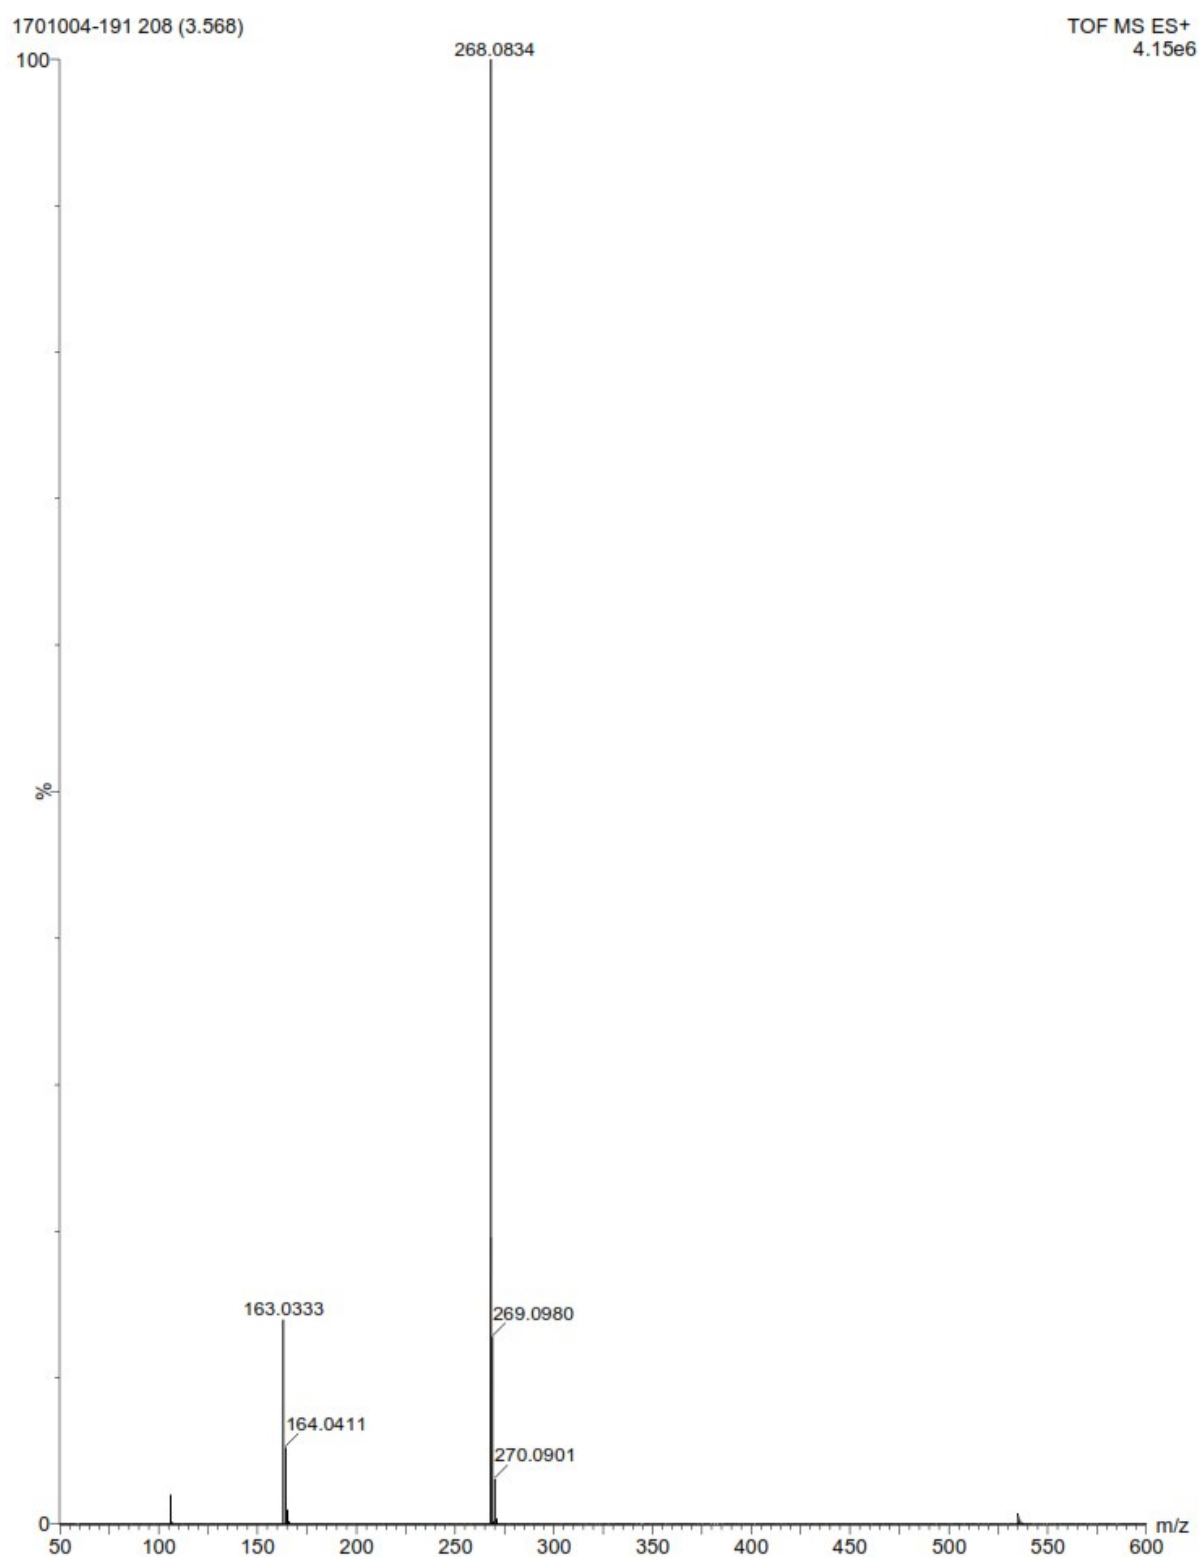

Mass spectra of compound no 1

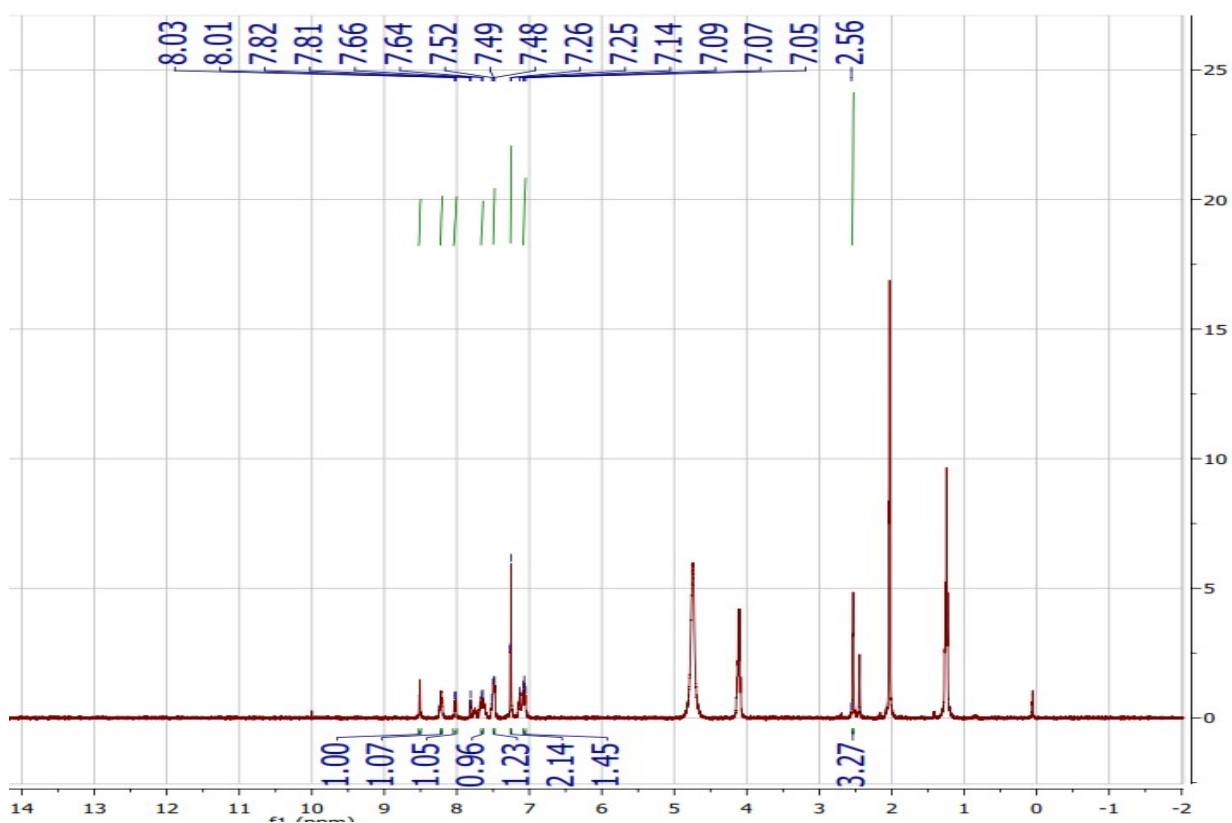

<sup>1</sup>H NMR spectra of compound no 3

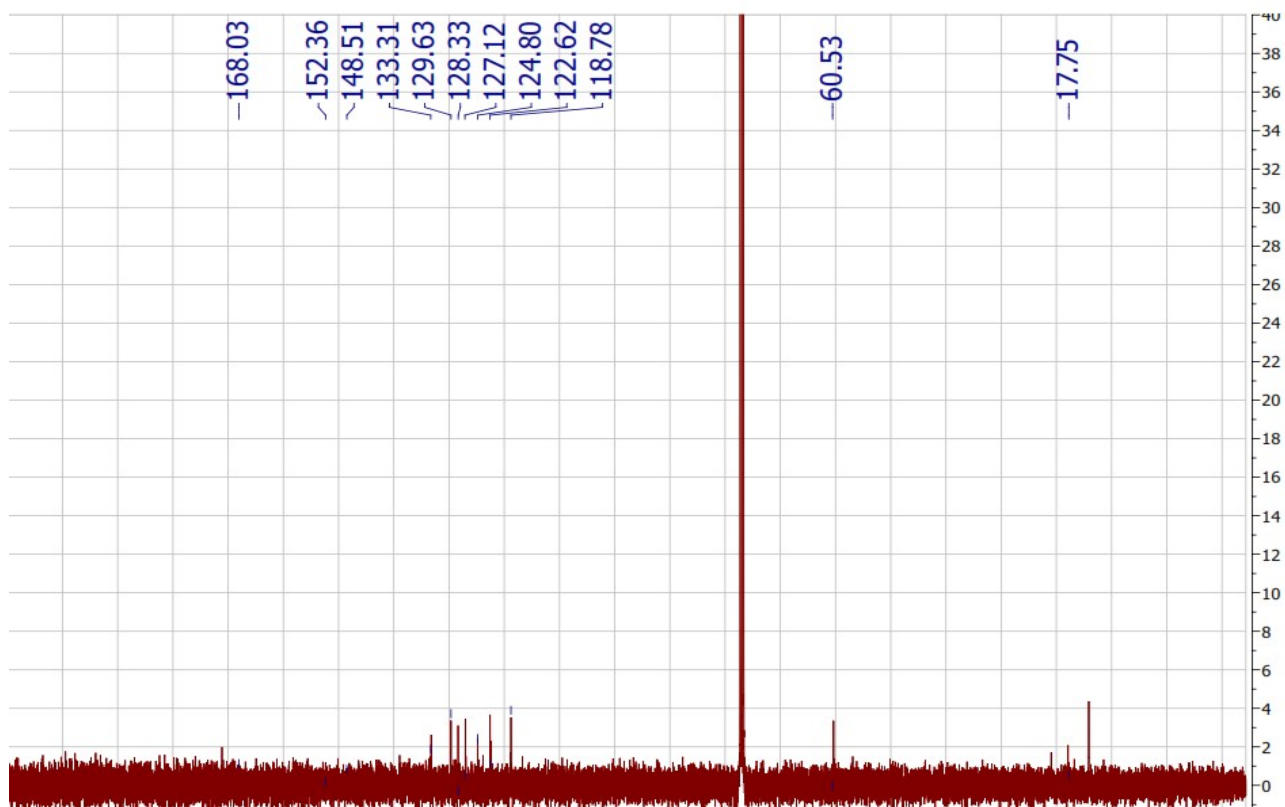

<sup>13</sup>C NMR spectra of compound no 3

1701004-195 204 (3.500)

TOF MS ES+  
1.88e6

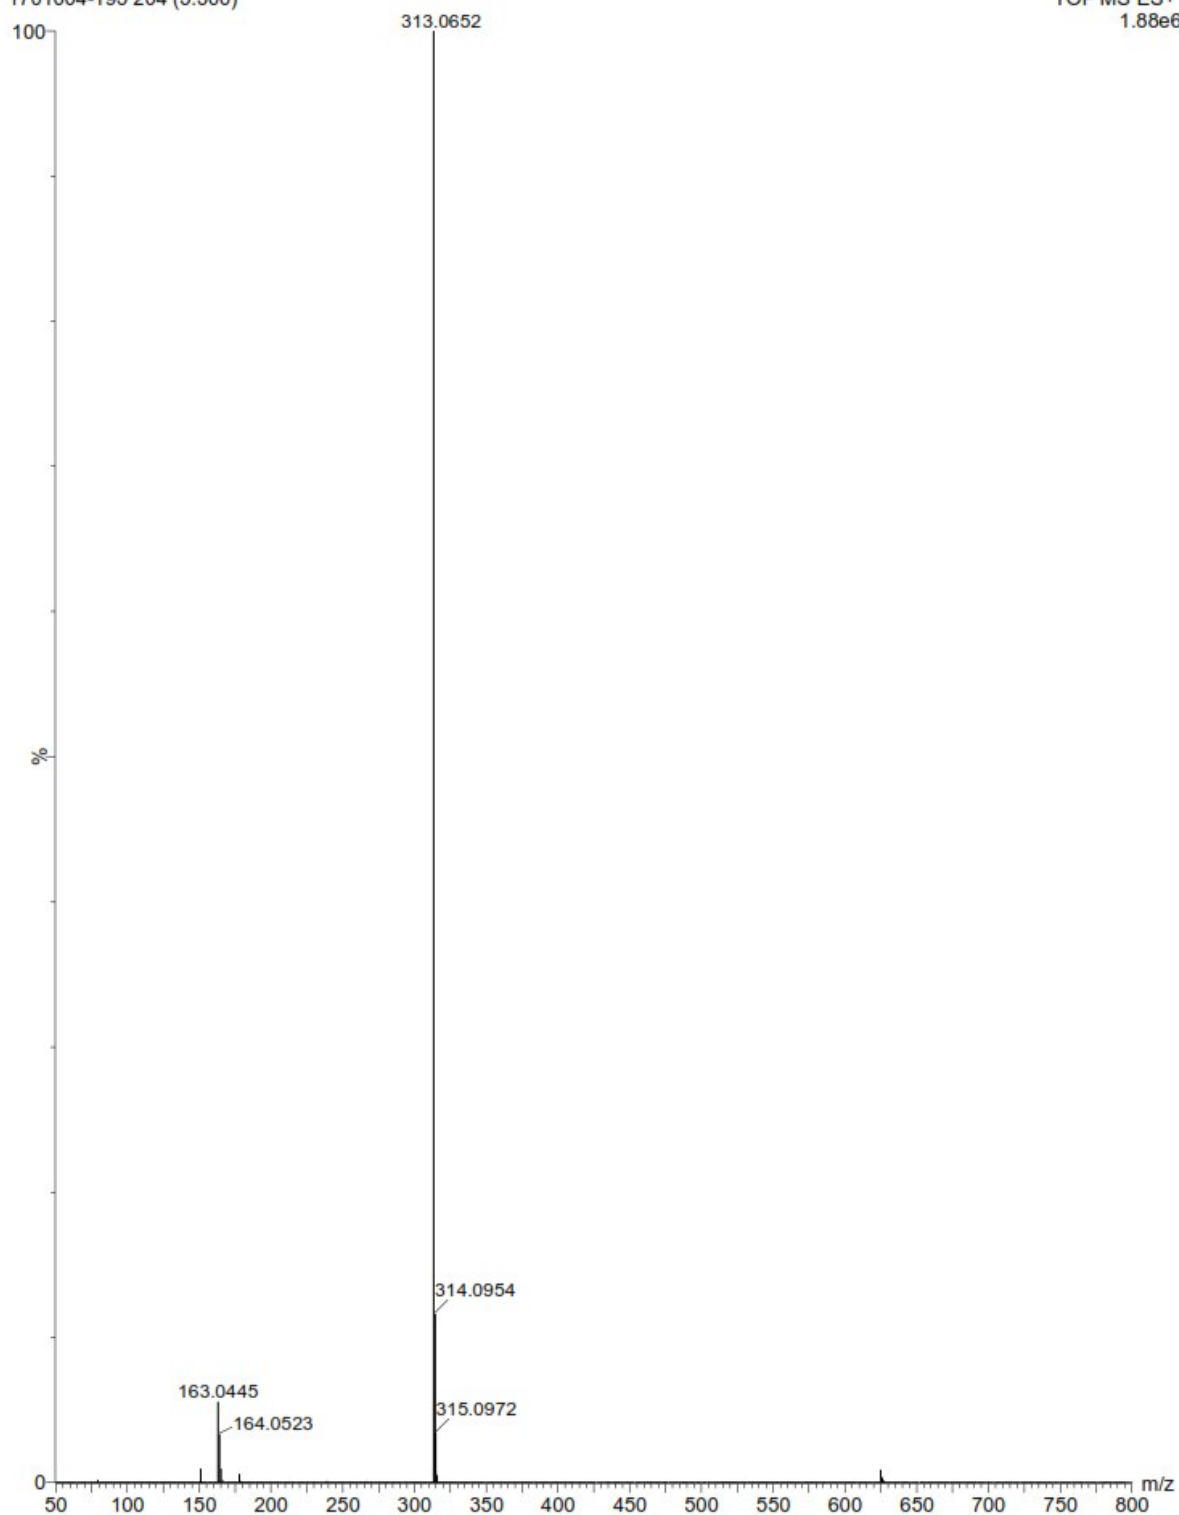

Mass spectra of compound no 3

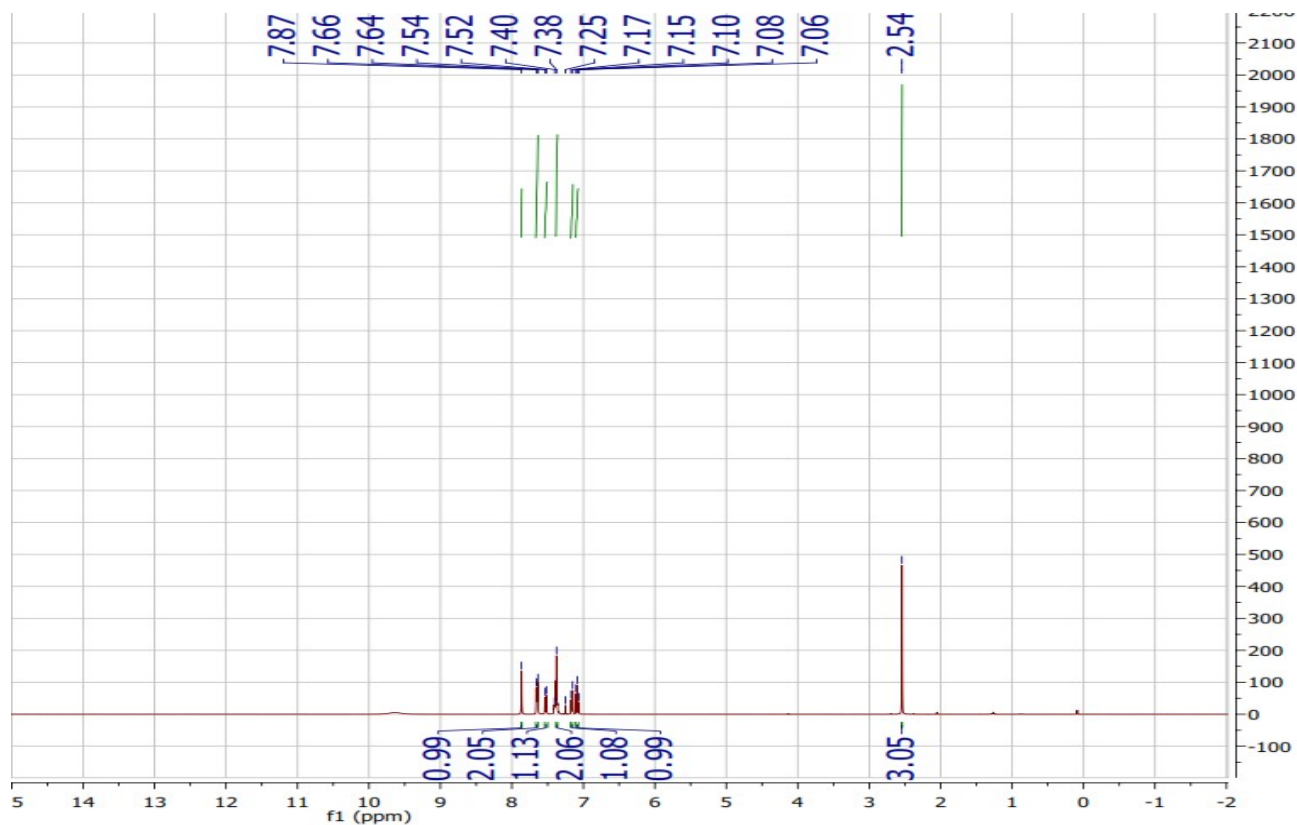

**<sup>1</sup>H NMR spectra of compound no 5**

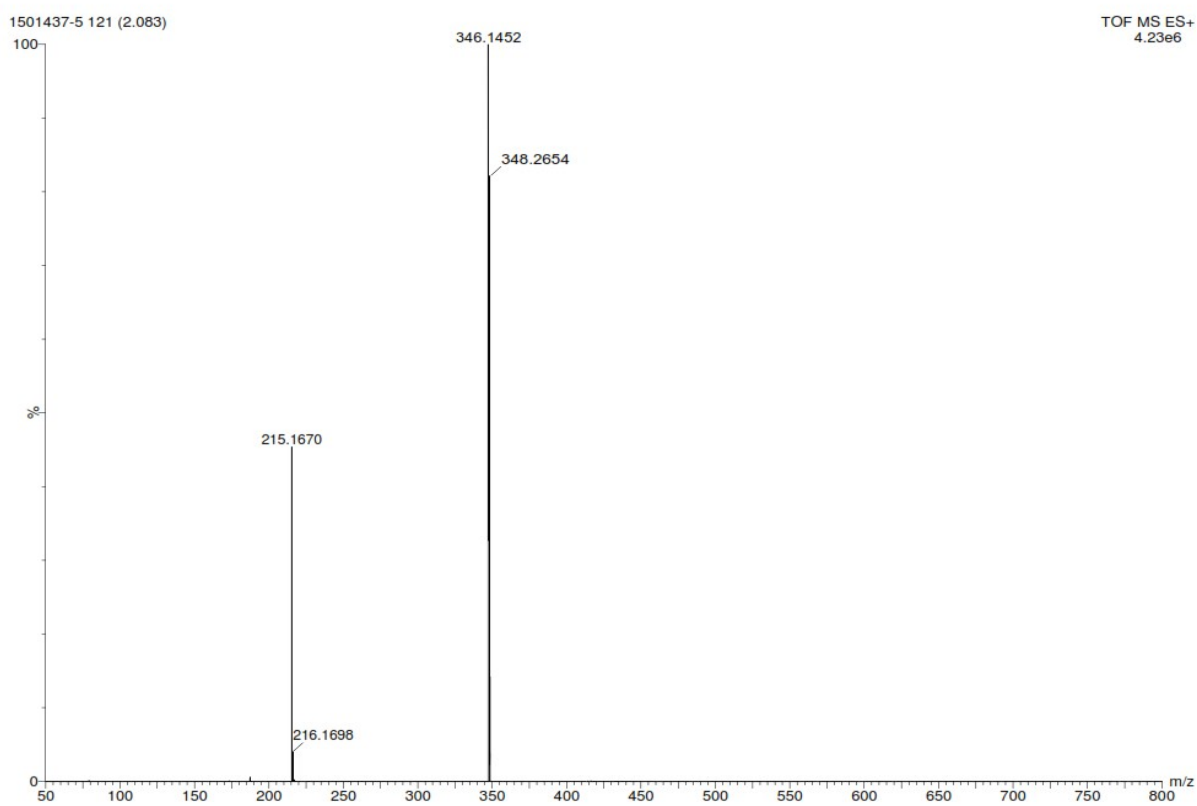

**Mass spectra of compound no 5**



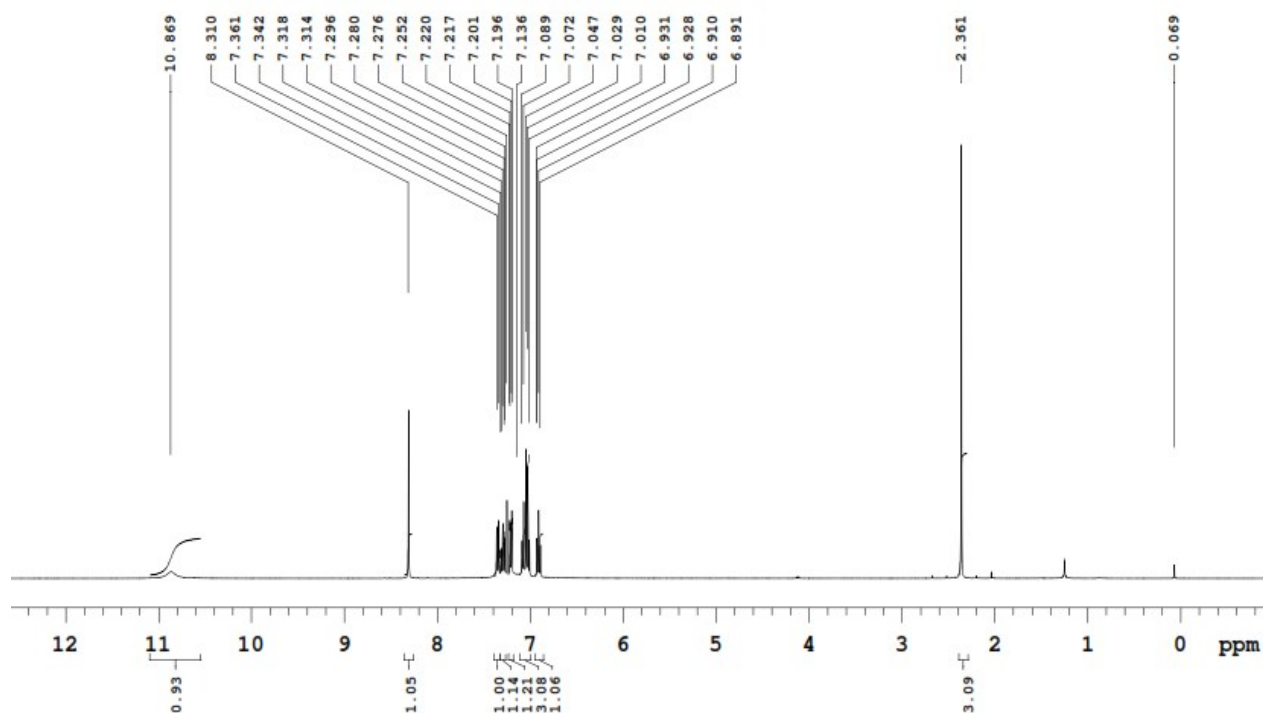

<sup>1</sup>H NMR spectra of compound no 6

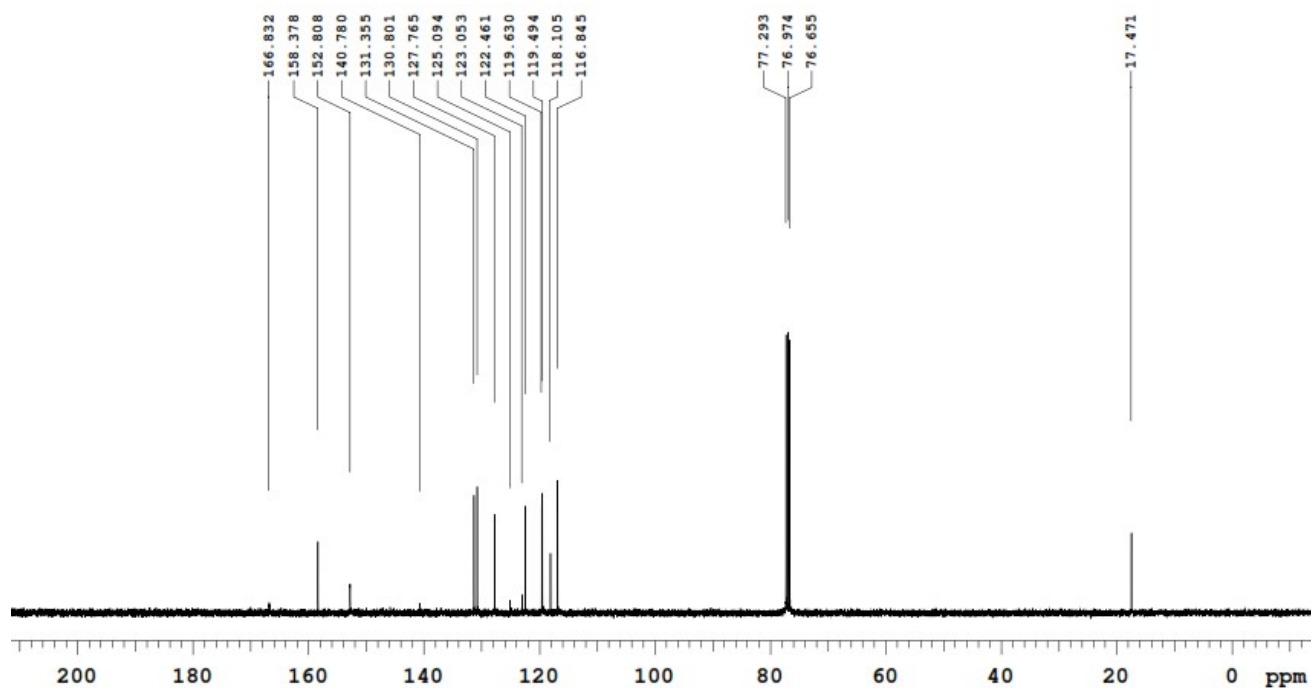

<sup>13</sup>C NMR spectra of compound no 6

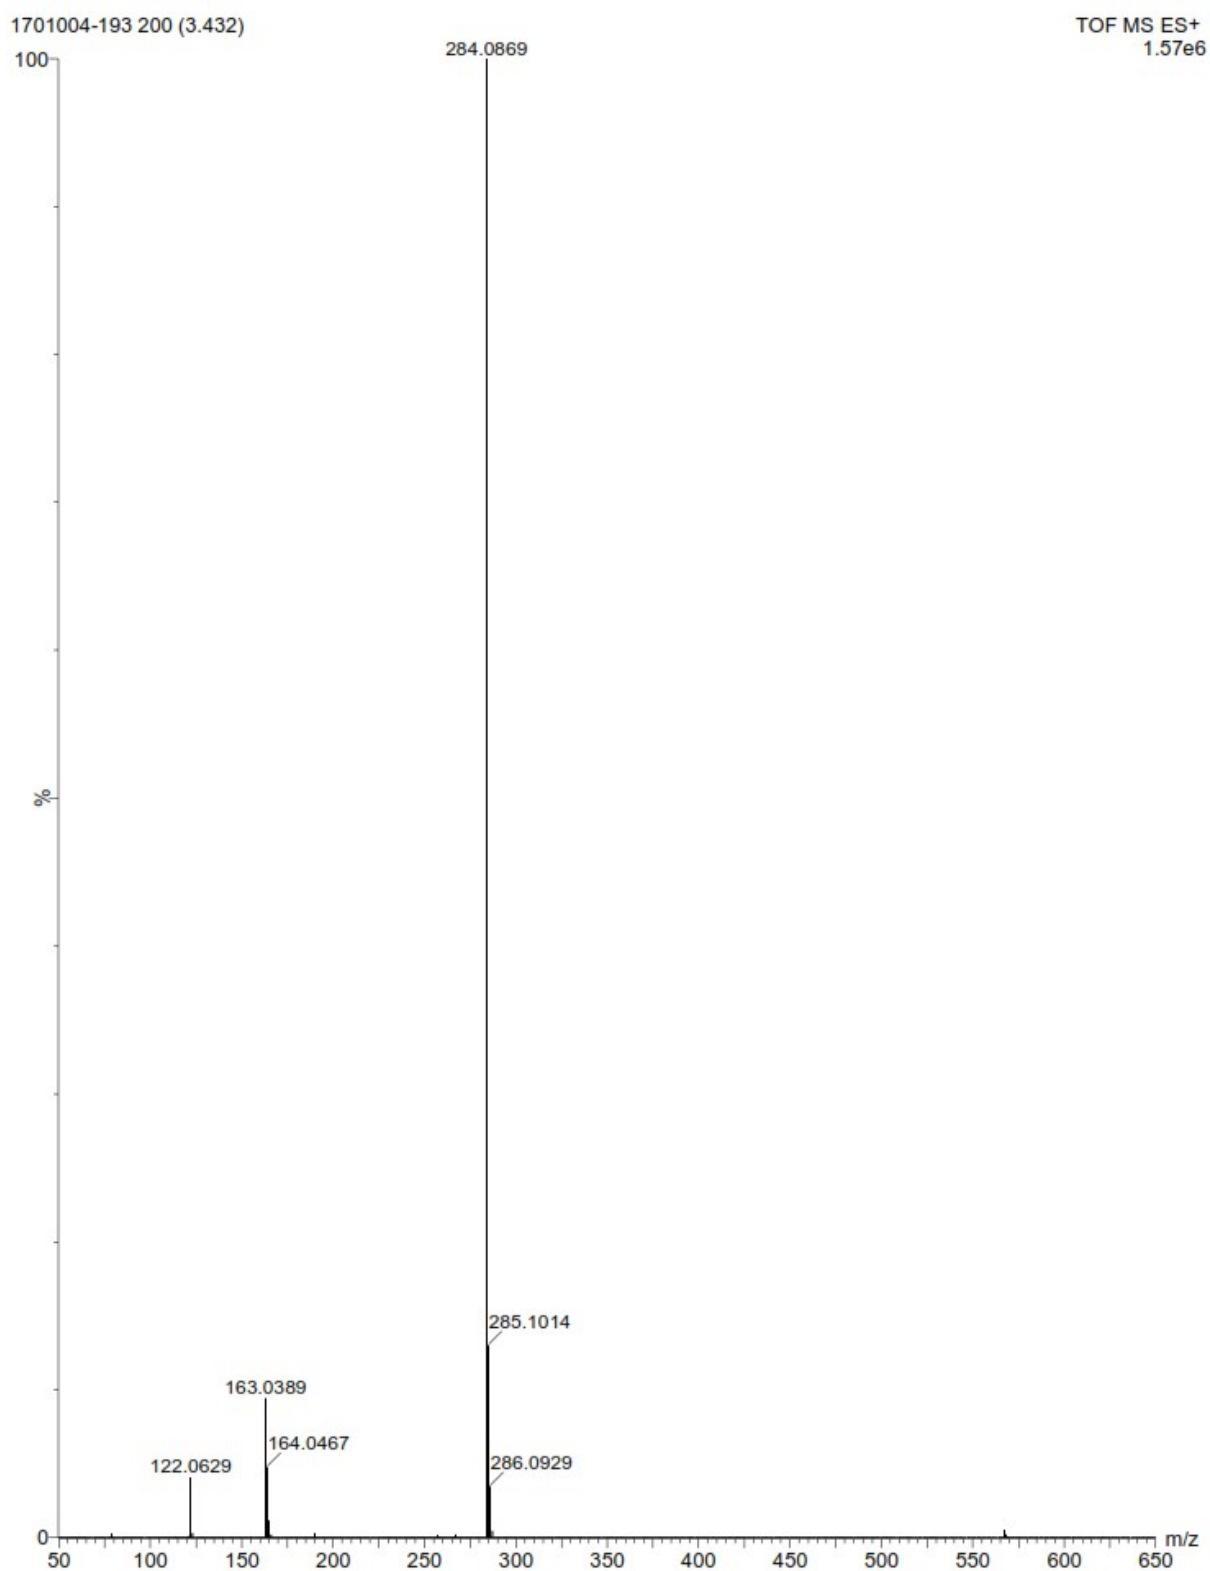

Mass spectra of compound no 6

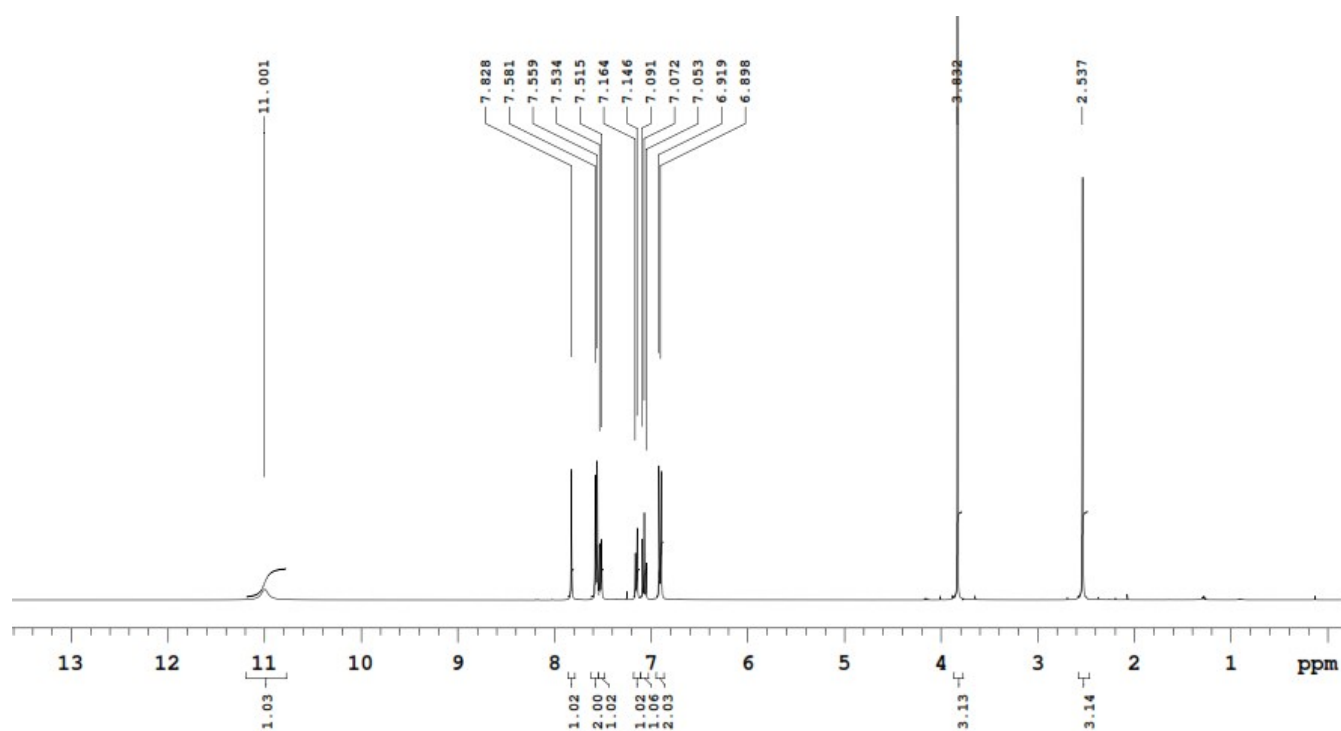

<sup>1</sup>H NMR spectra of compound no 7

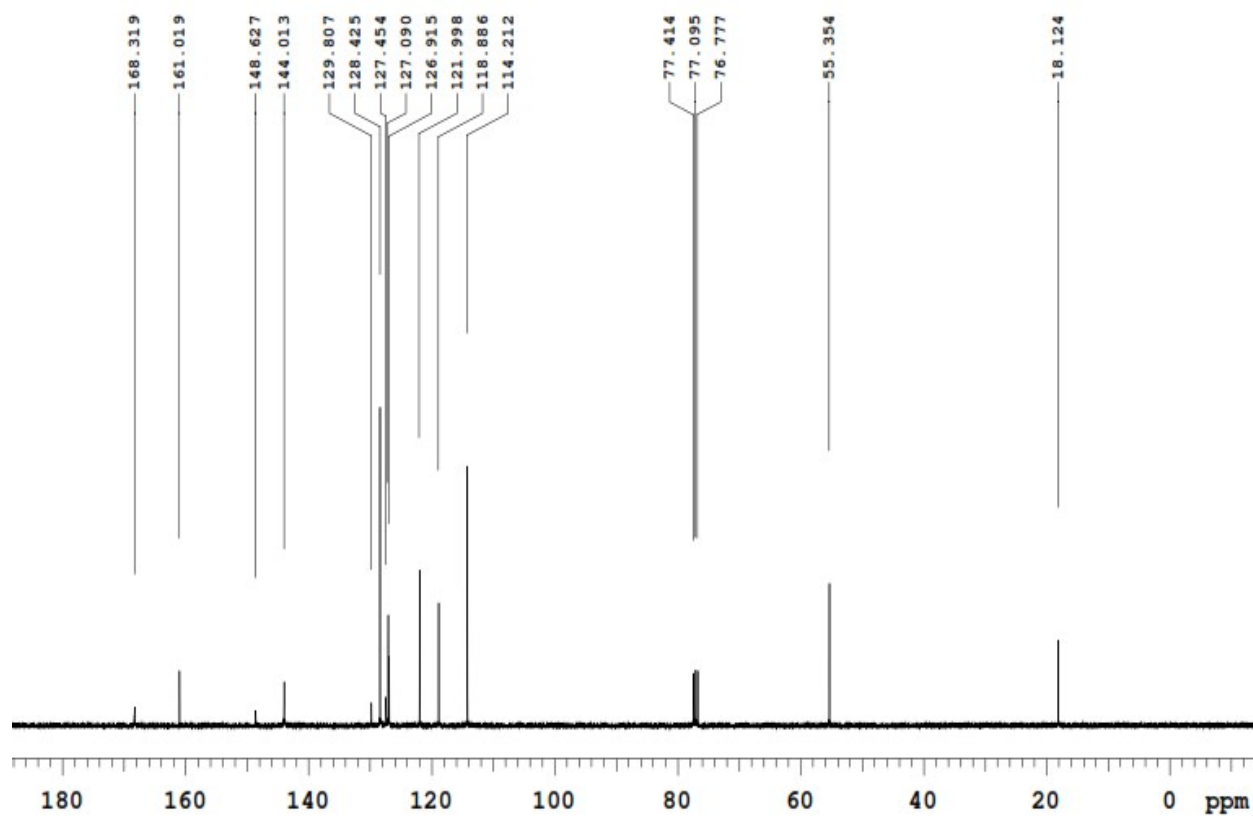

<sup>13</sup>C NMR spectra of compound no 7

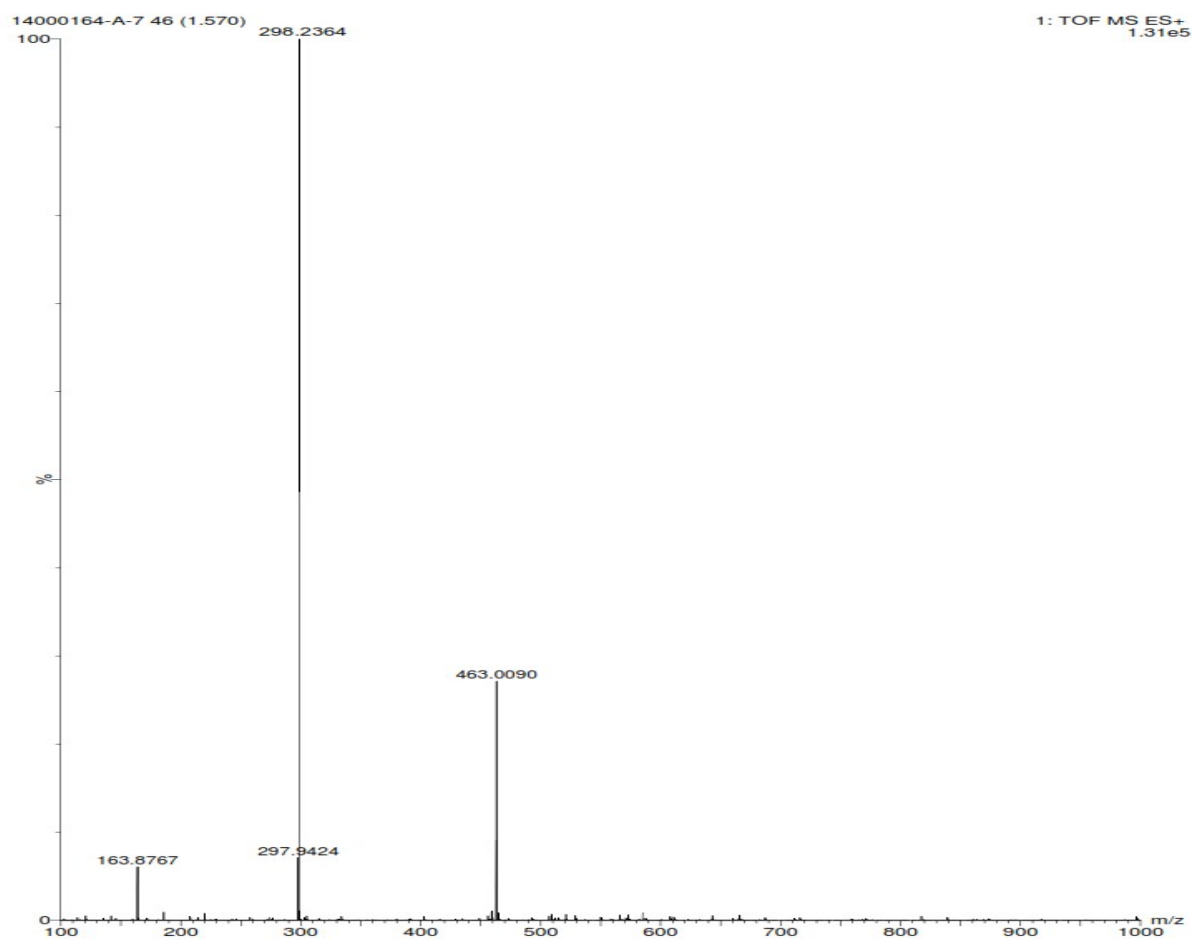

Mass spectra of compound no 7

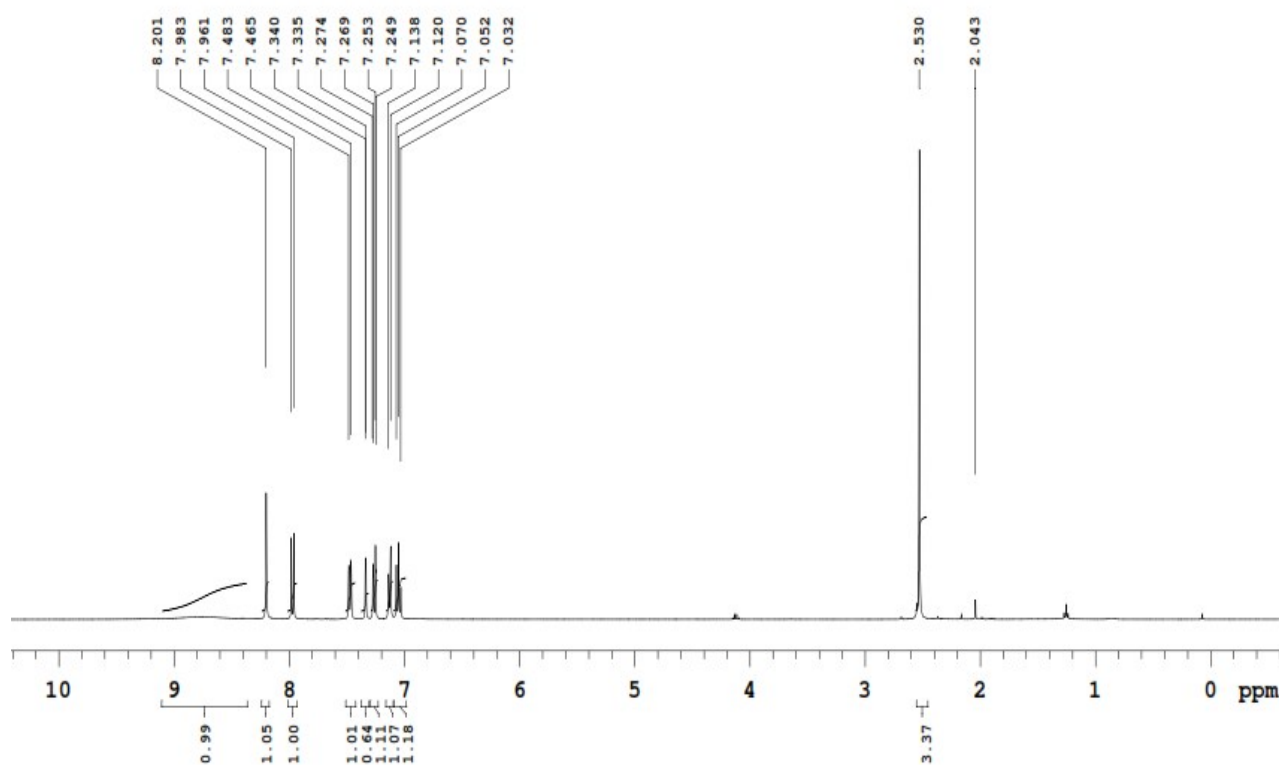

<sup>1</sup>H NMR spectra of compound no 9

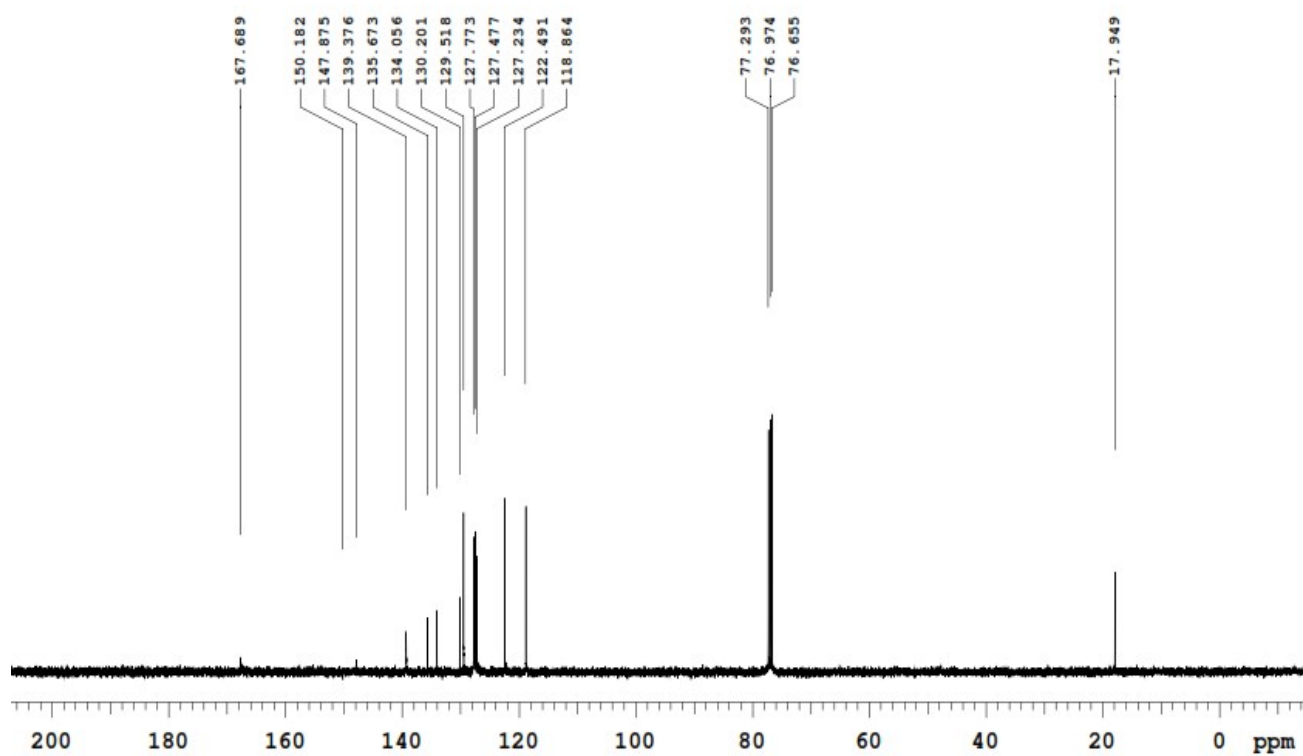

$^{13}\text{C}$  NMR spectra of compound no 9

1701004-203 243 (4.166)

TOF MS ES+  
6.52e5

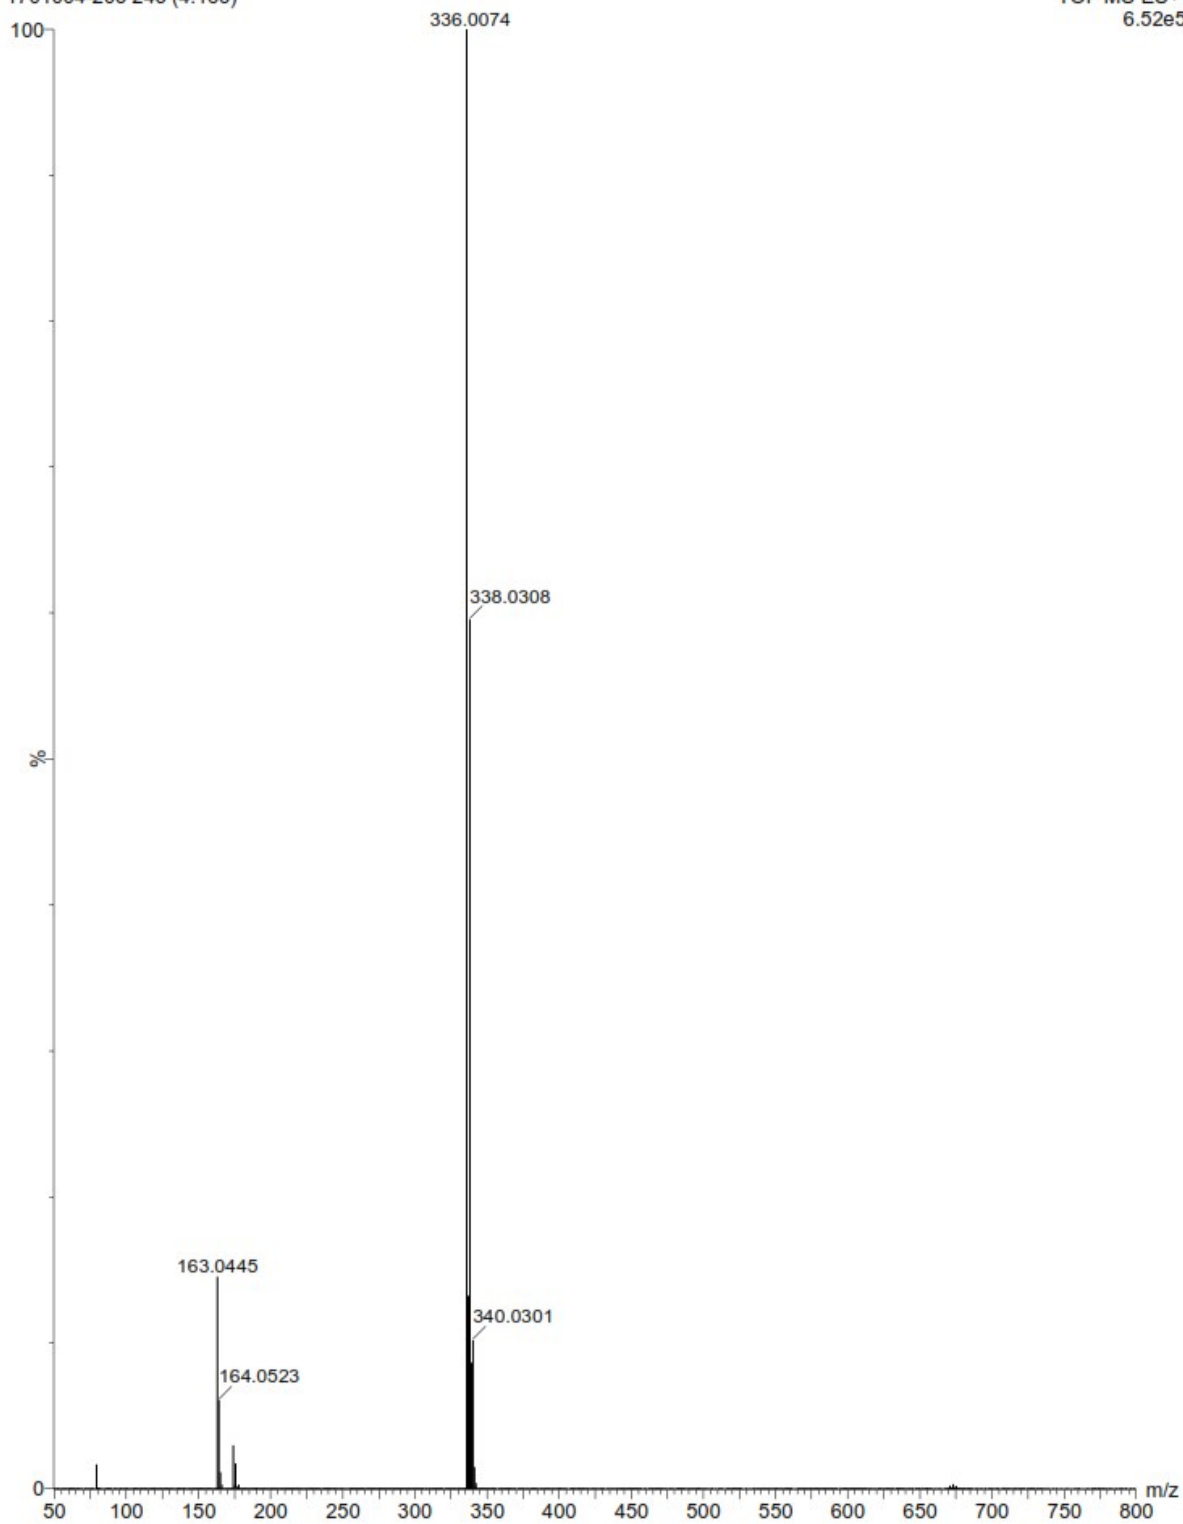

Mass spectra of compound no 9

1701004-204 205 (3.517)

TOF MS ES+  
1.74e5

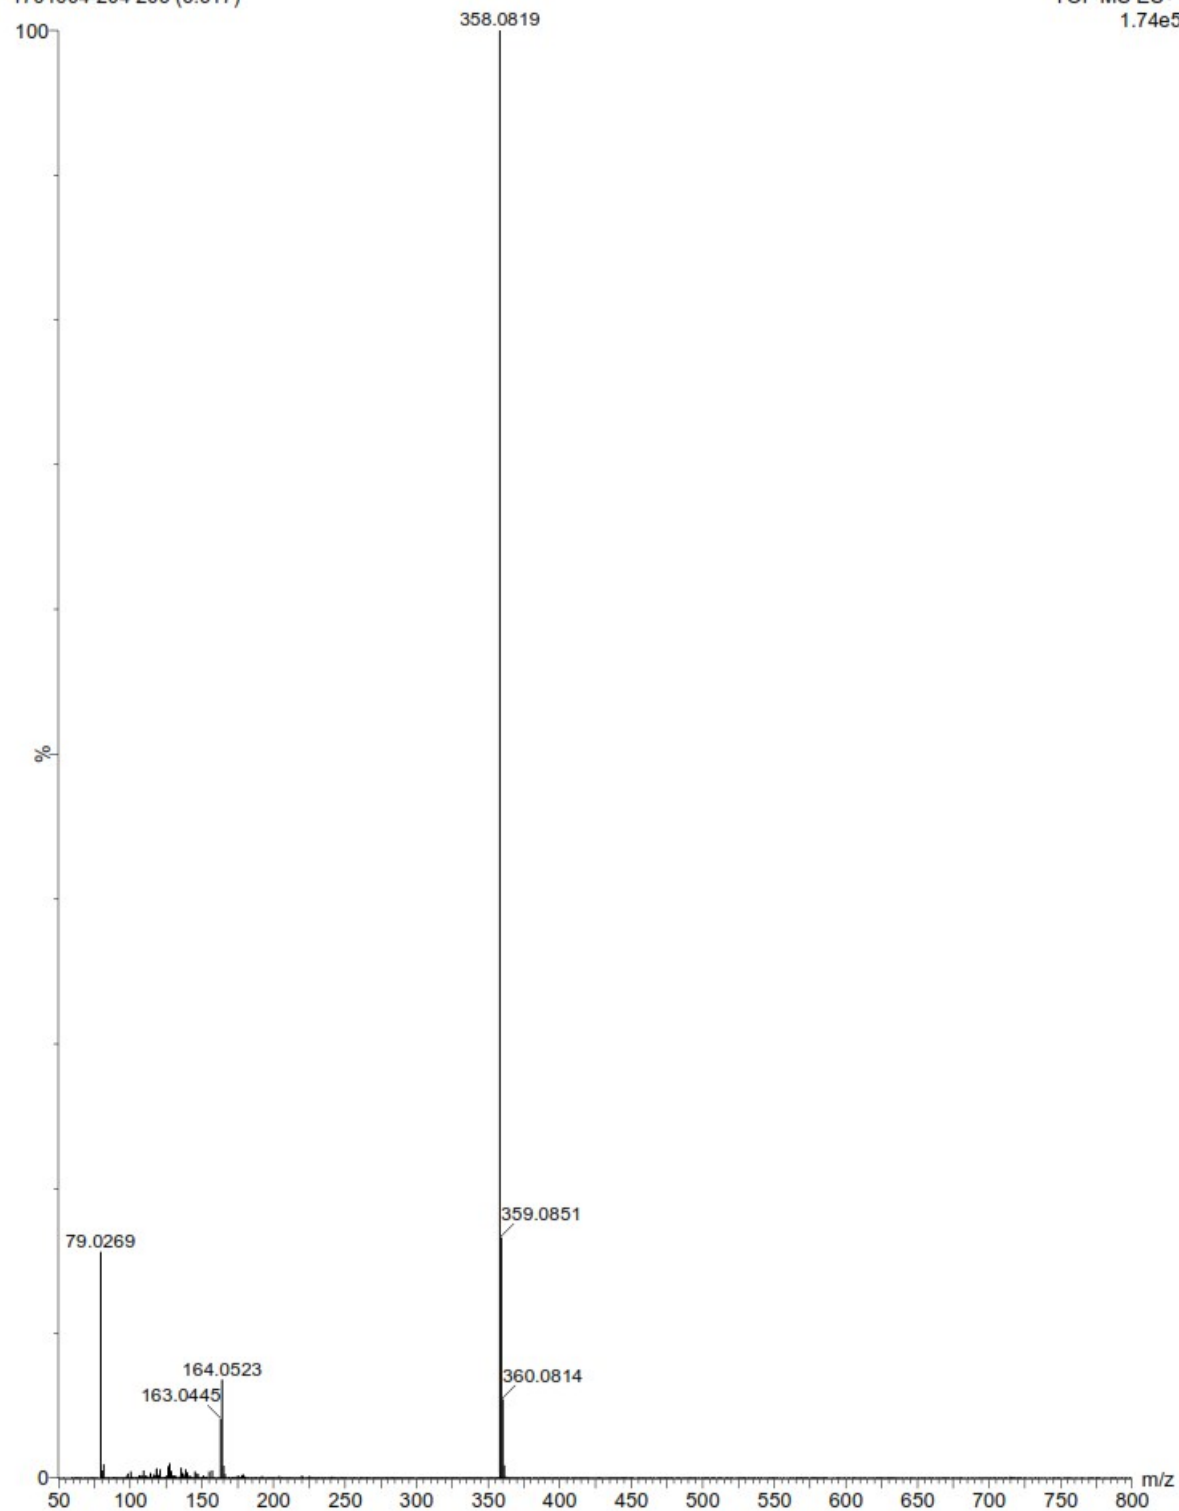

**Mass spectra of compound no 10**

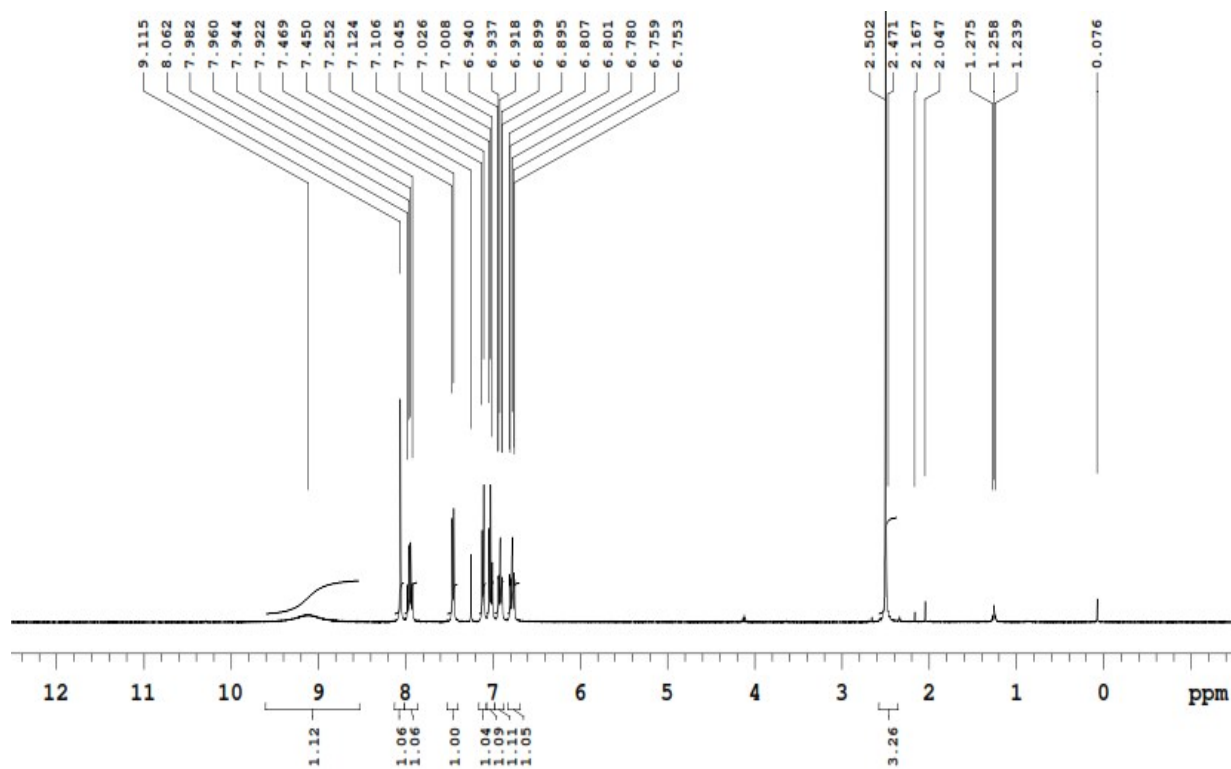

<sup>1</sup>H NMR spectra of compound no 11

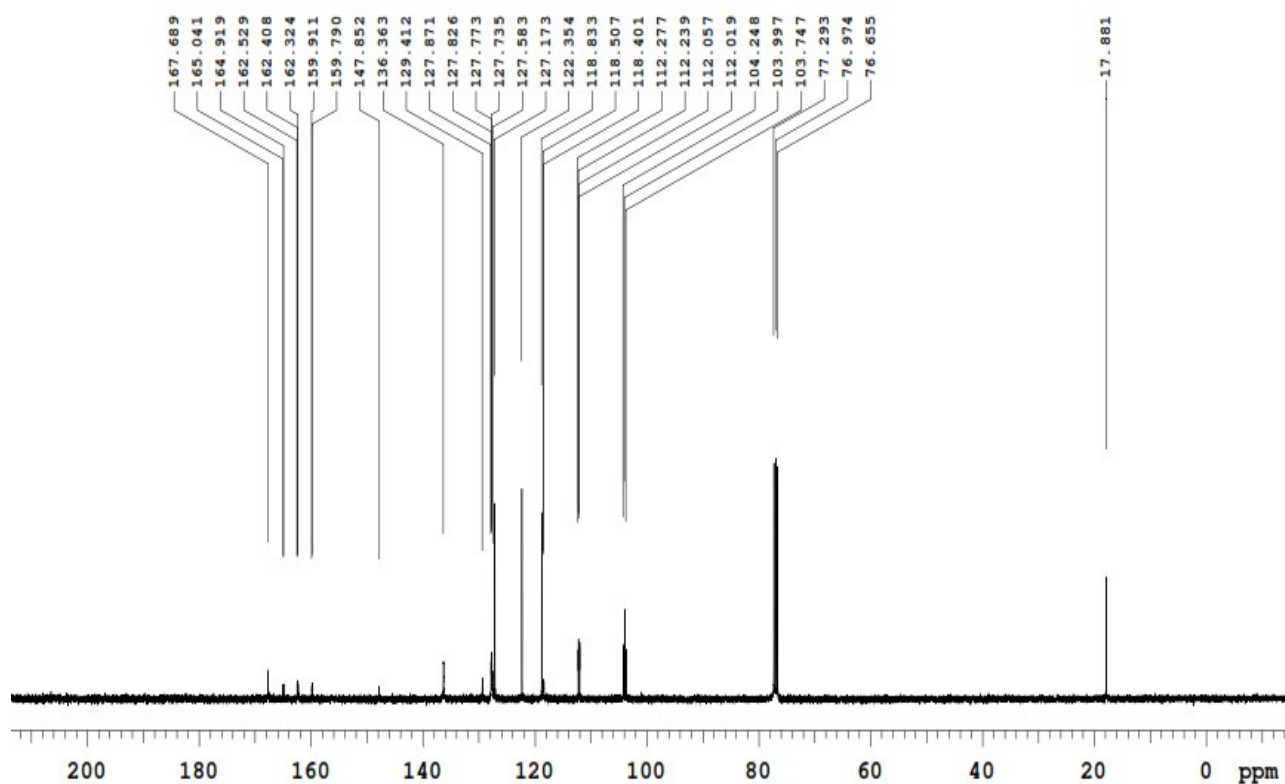

<sup>13</sup>C NMR spectra of compound no 11



1701004-205 215 (3.688)

TOF MS ES+  
3.08e6

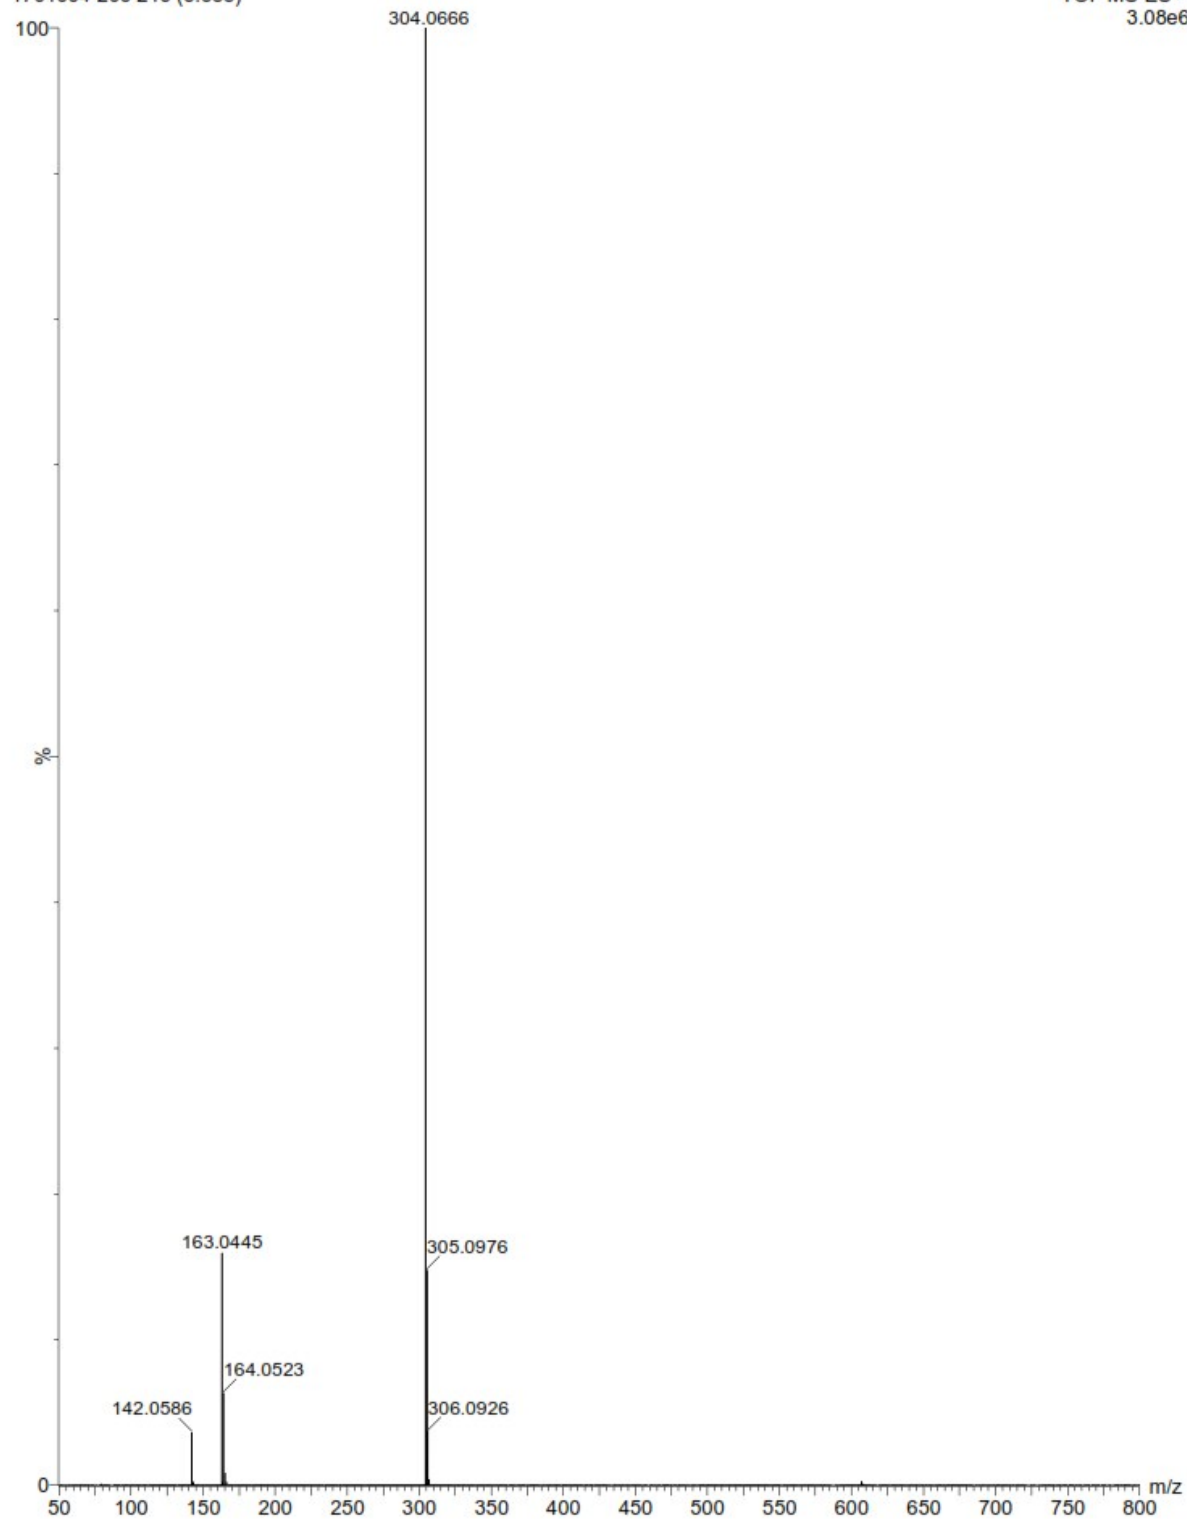

Mass spectra of compound no 11

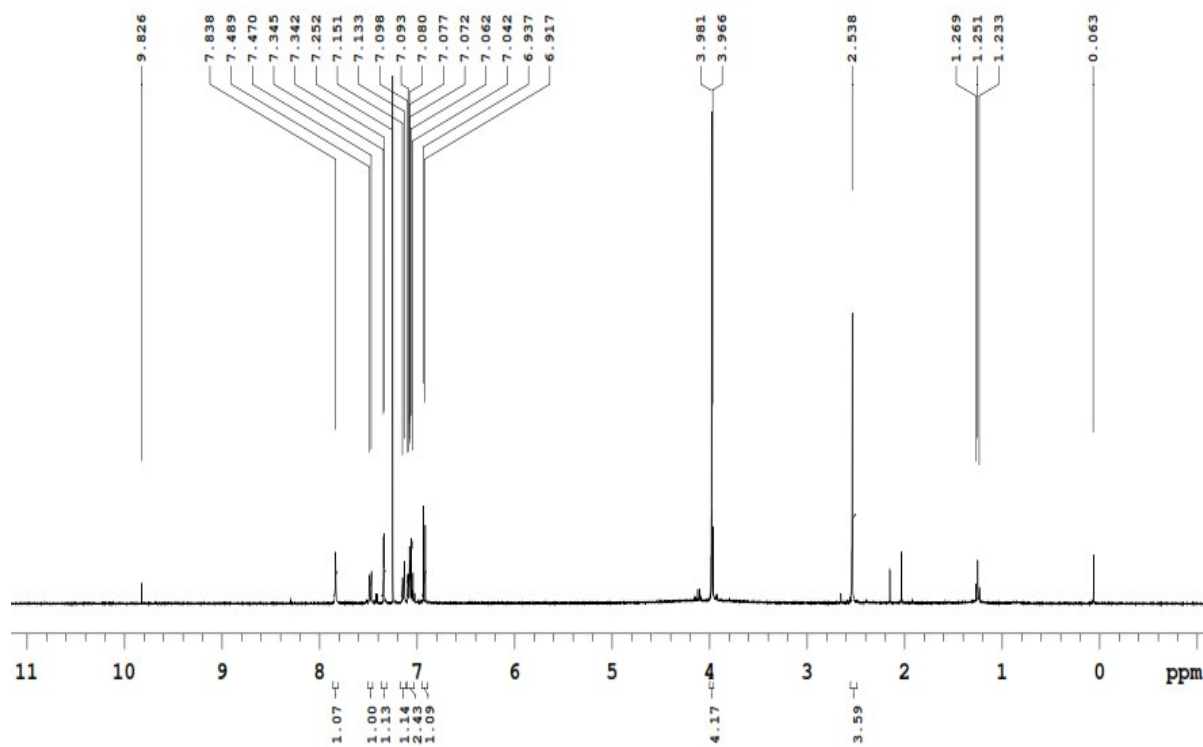

<sup>1</sup>H NMR spectra of compound no 15

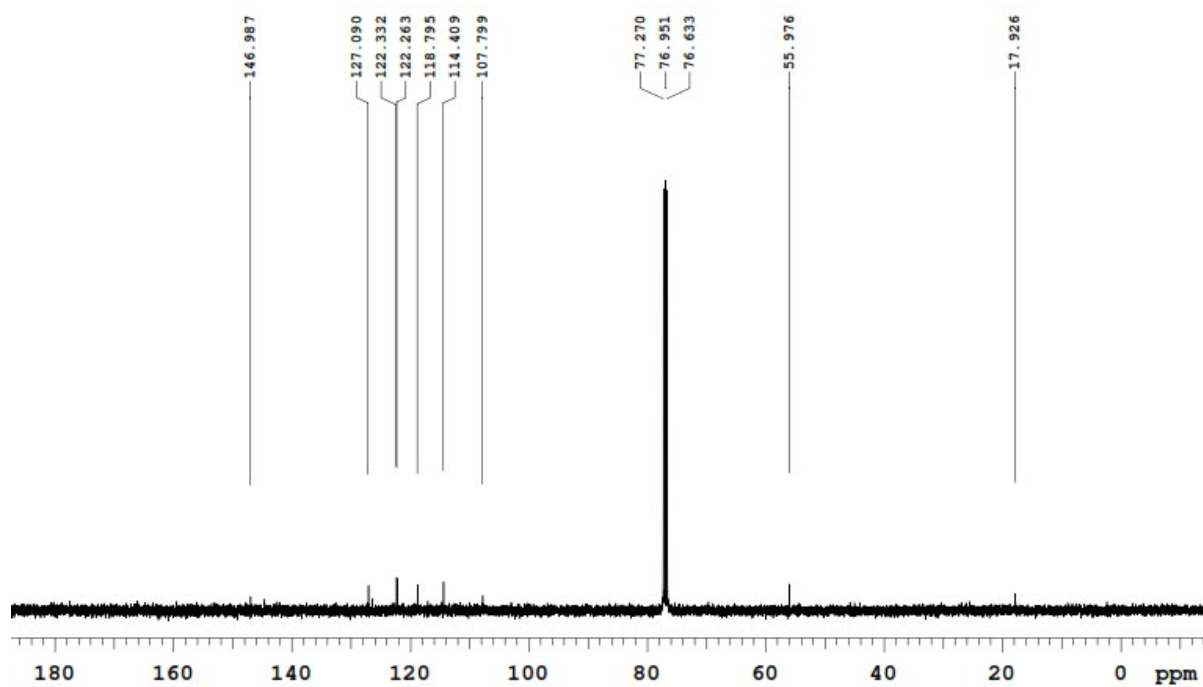

<sup>13</sup>C NMR spectra of compound no 15

1701004-202 172 (2.953)

TOF MS ES+  
7.05e6

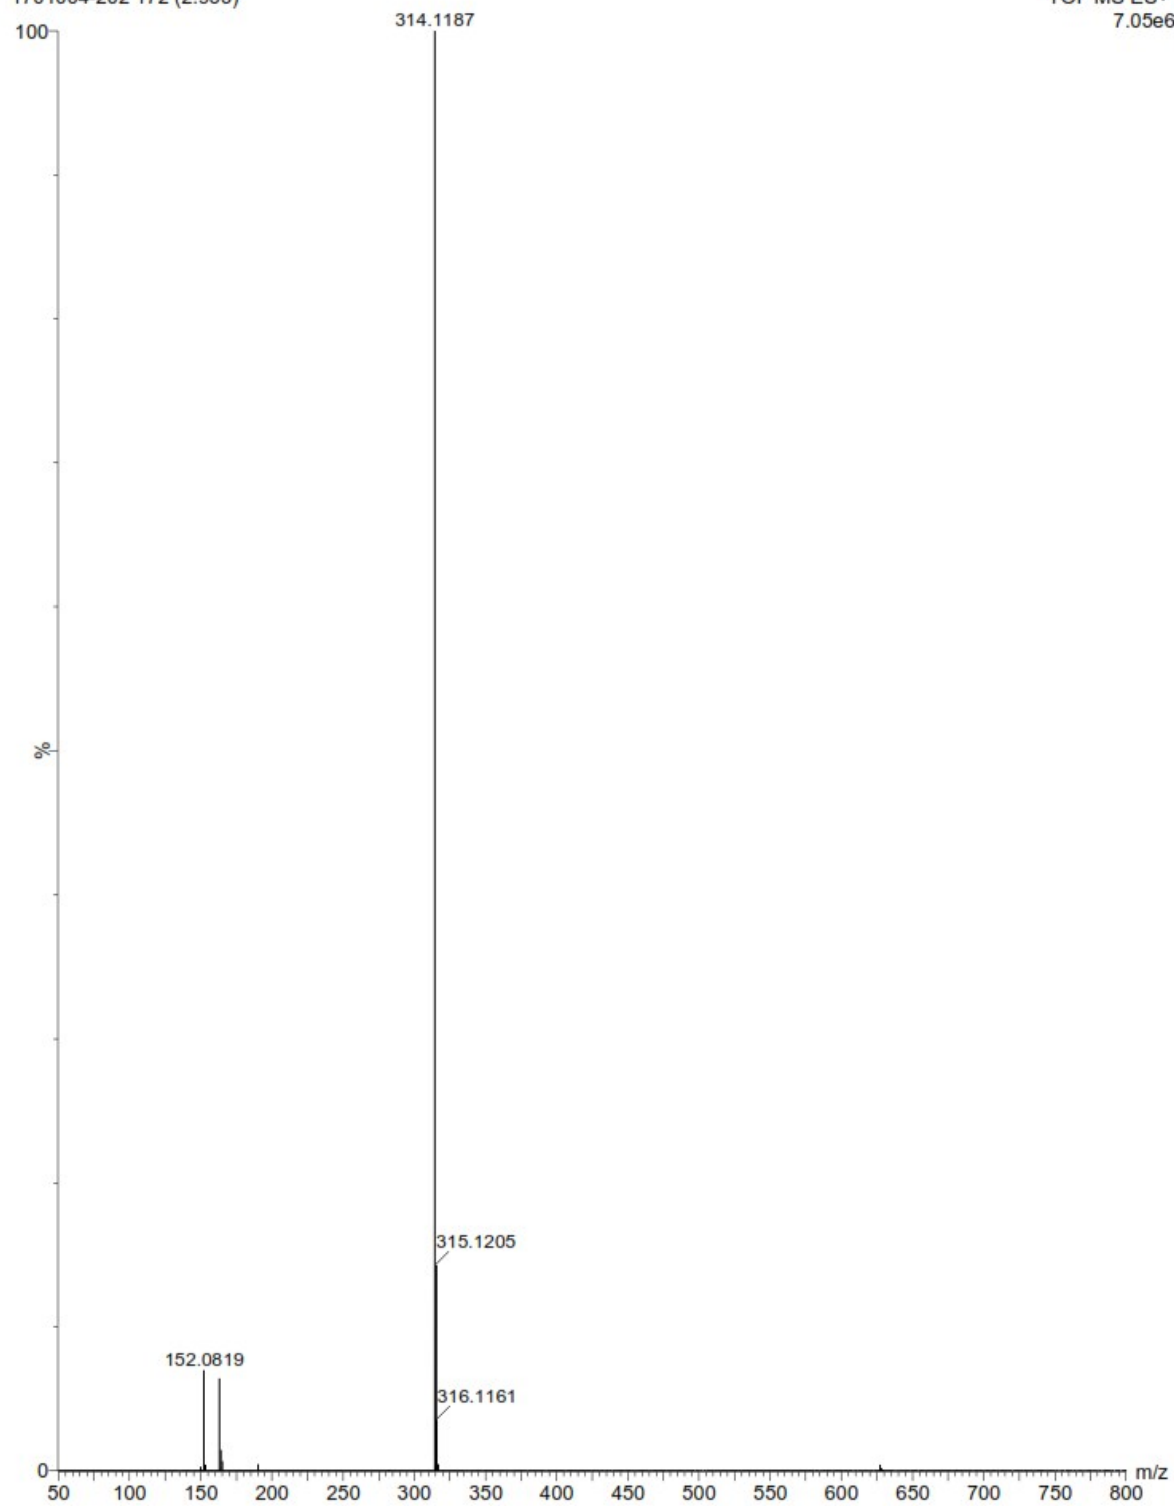

Mass spectra of compound no 15

1701004-208 190 (3.261)

TOF MS ES+  
1.08e6

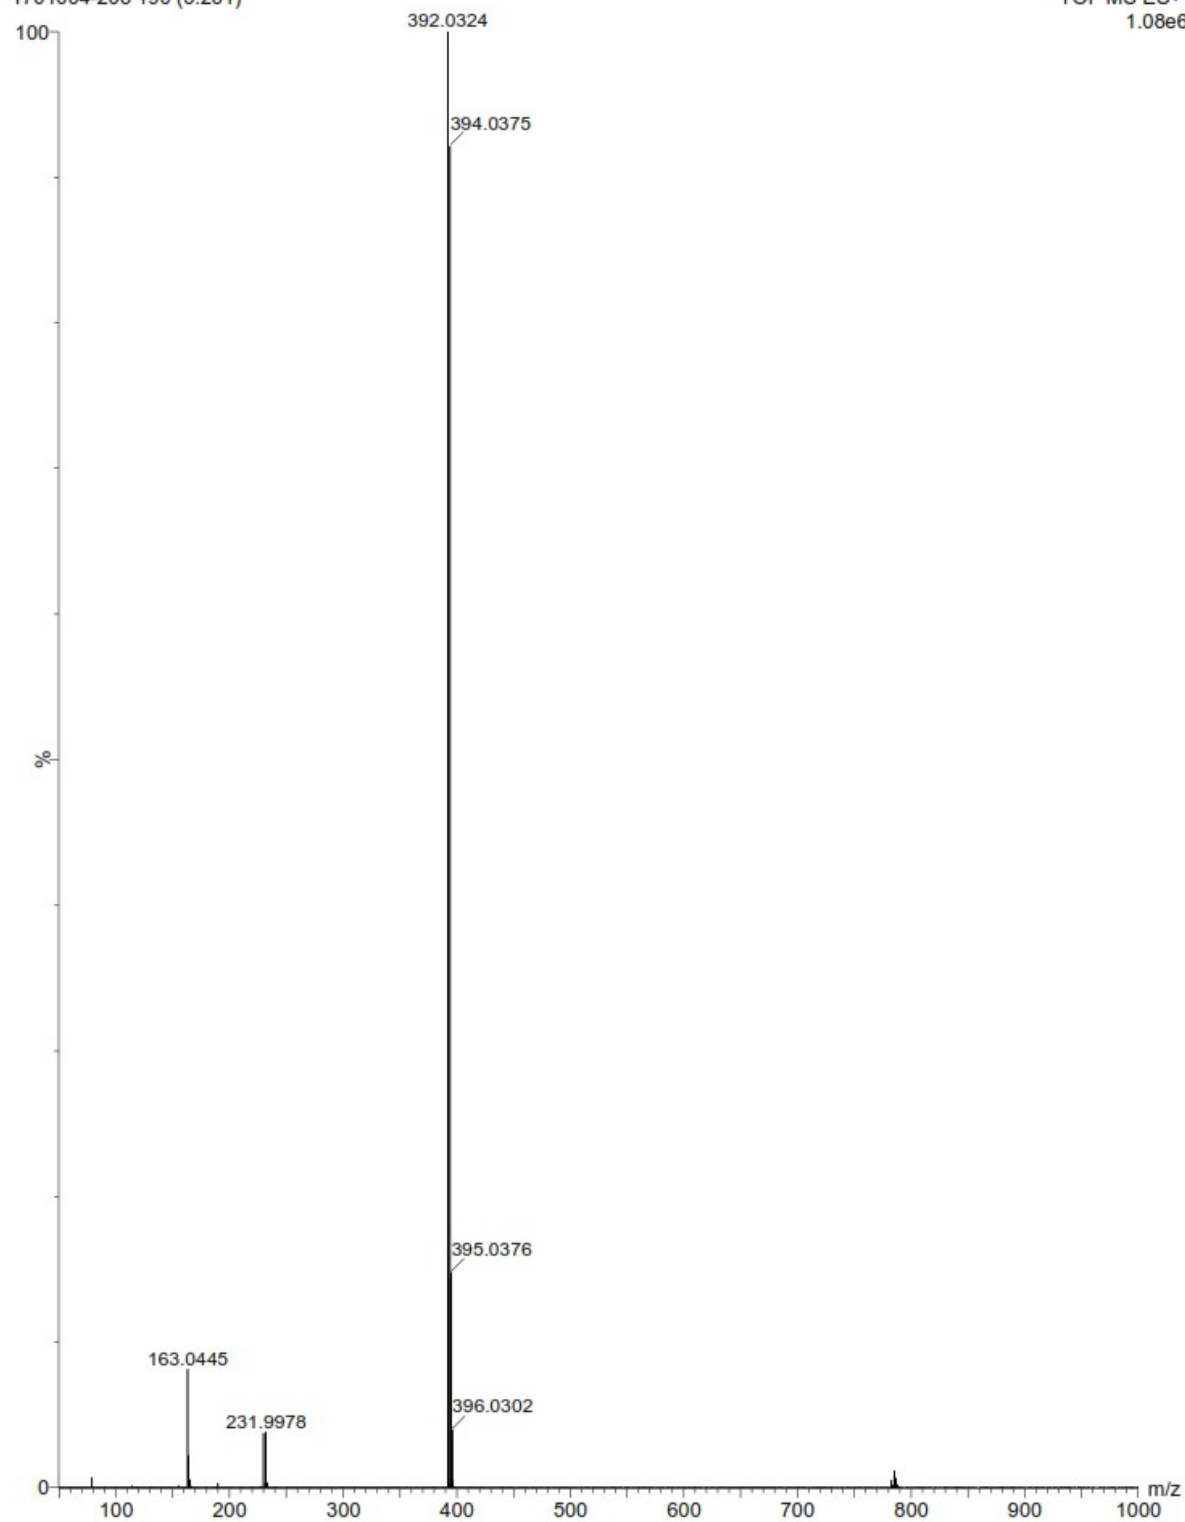

Mass spectra of compound no 18

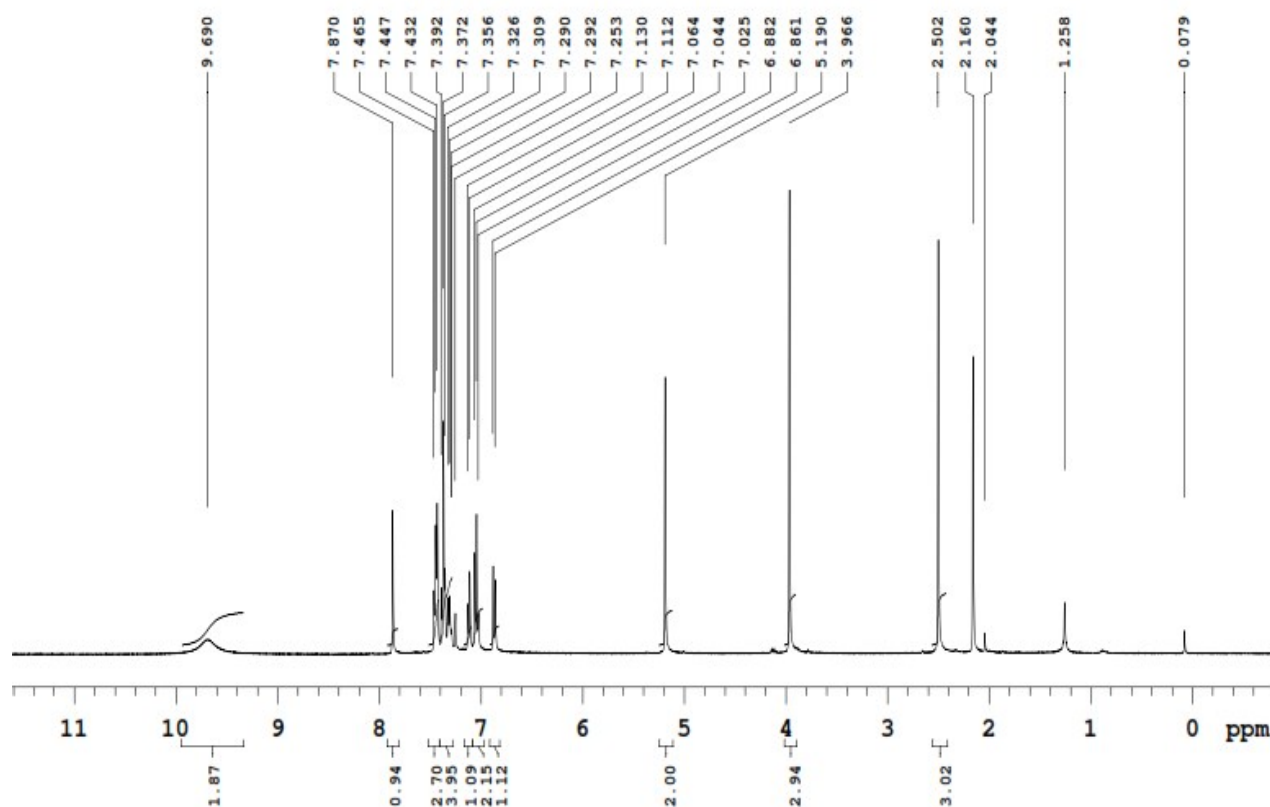

<sup>1</sup>H NMR spectra of compound no 22

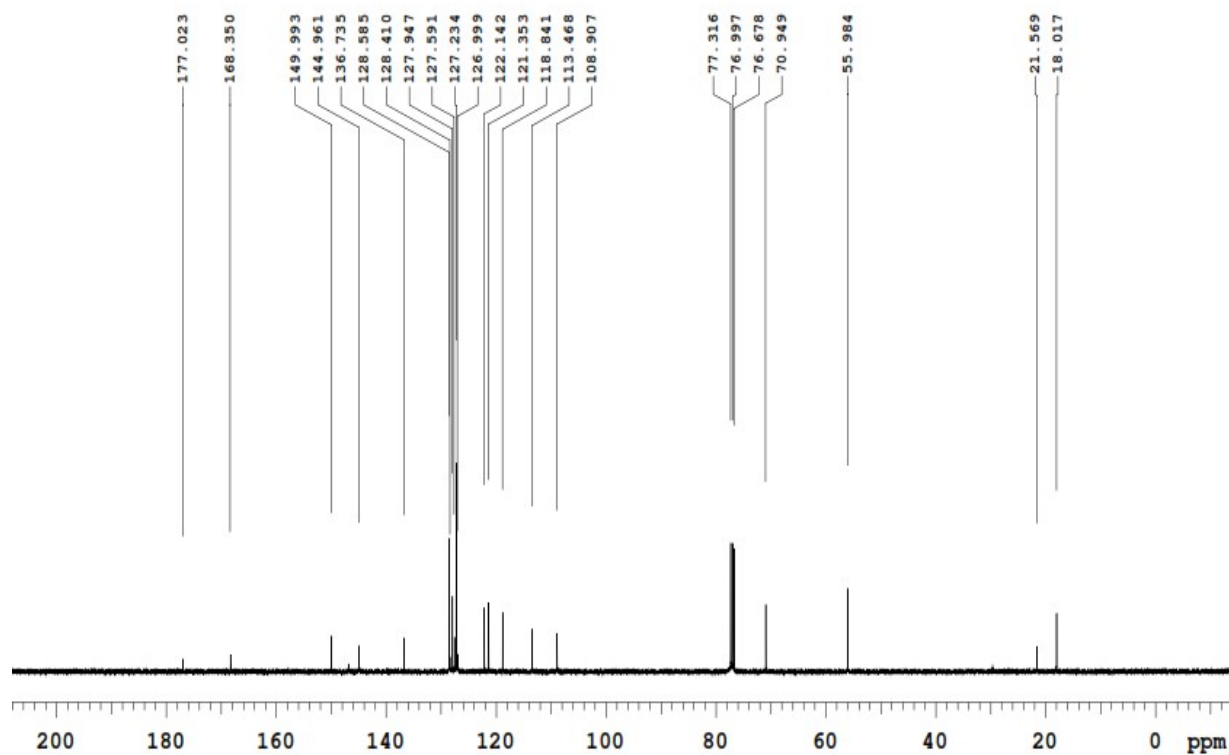

<sup>13</sup>C NMR spectra of compound no 22

1701004-211 222 (3.807)

TOF MS ES+  
3.53e6

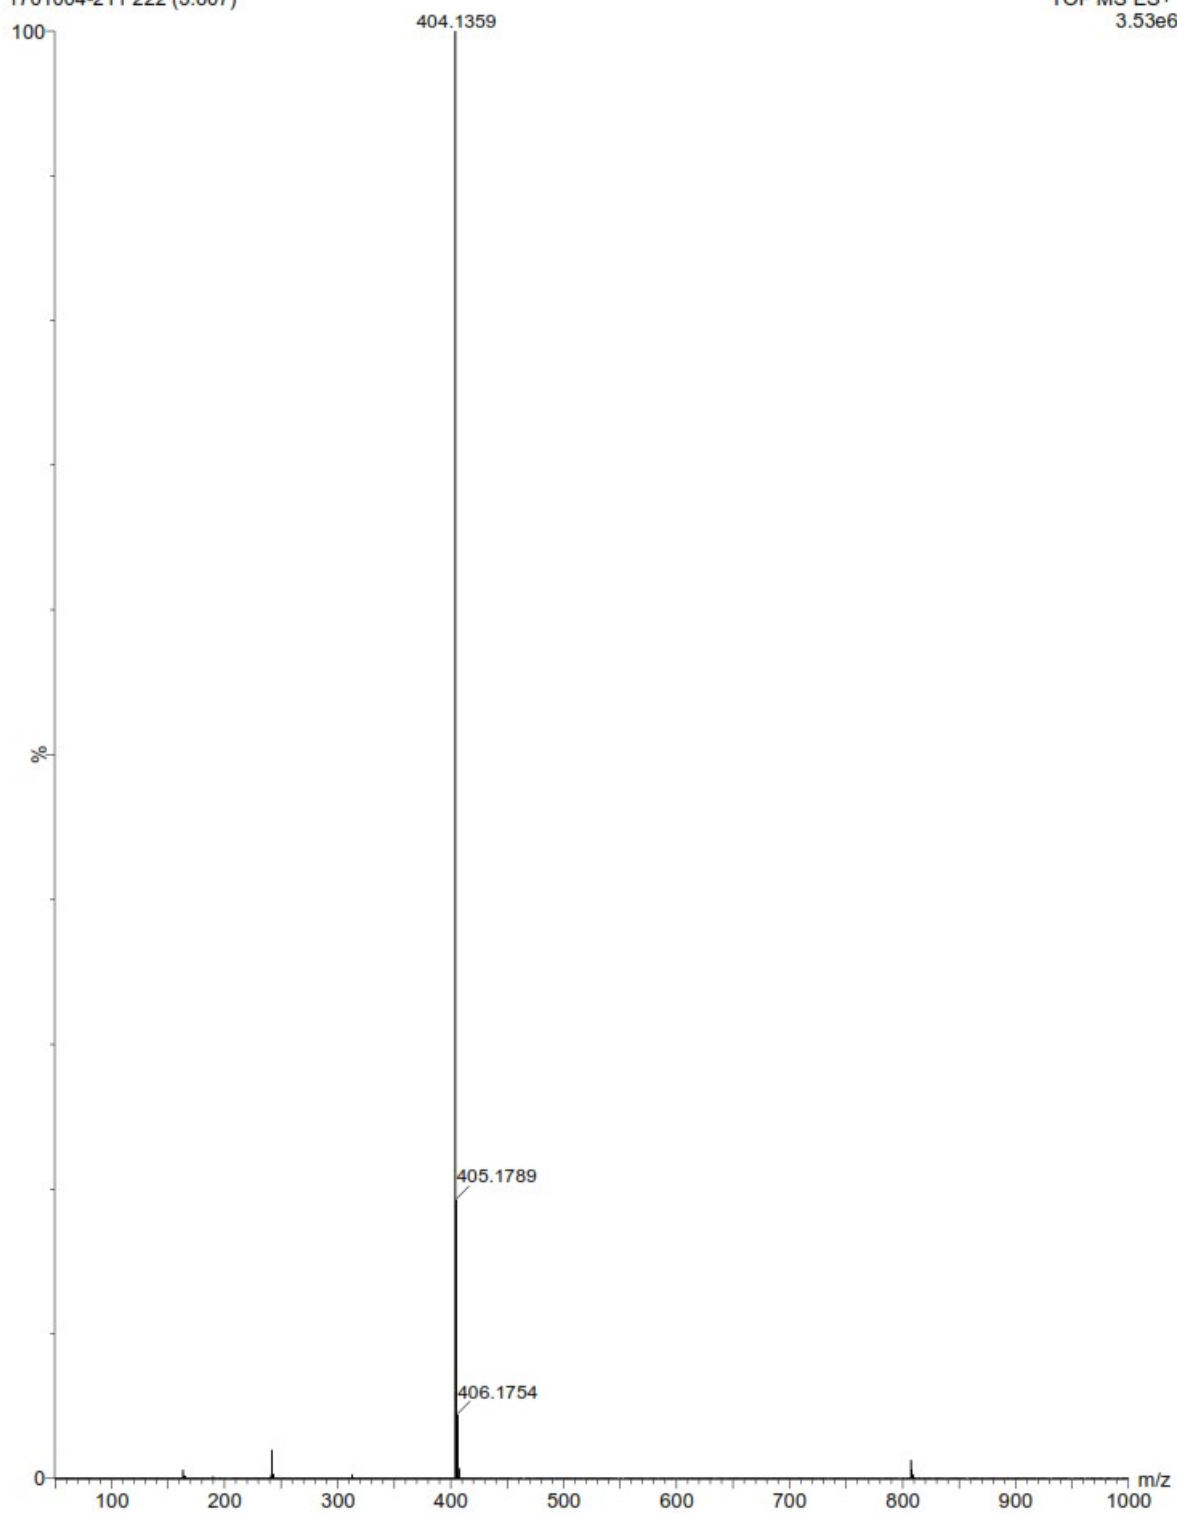

Mass spectra of compound no 22

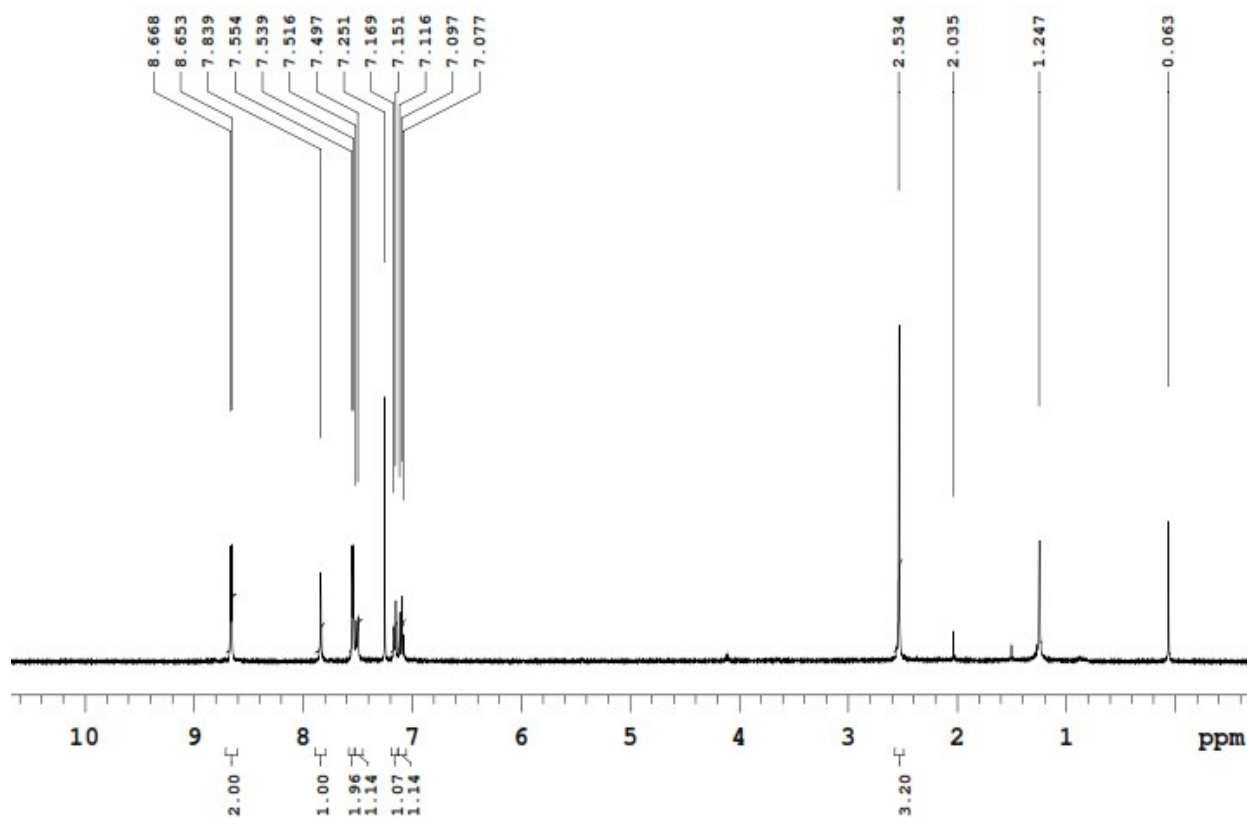

<sup>1</sup>H NMR spectra of compound no 23

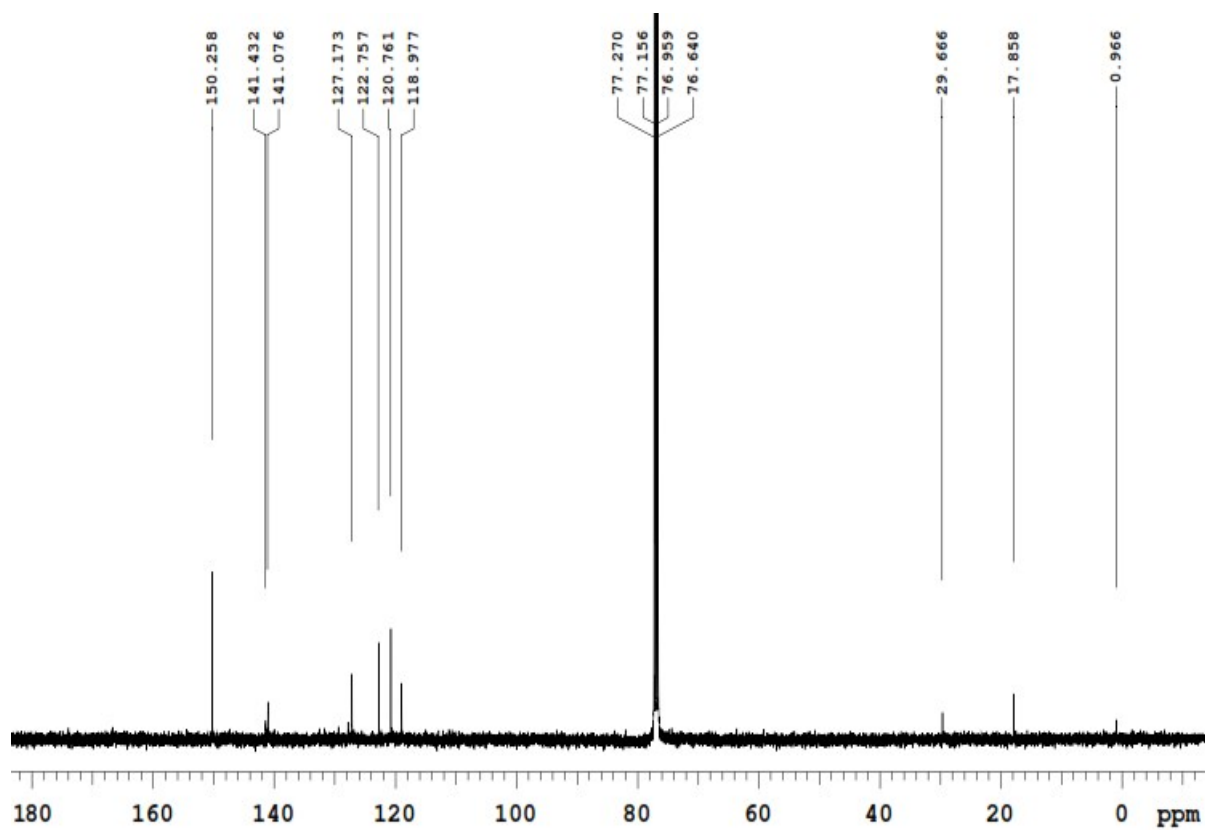

<sup>13</sup>C NMR spectra of compound no 23

1701004-197 122 (2.100)

TOF MS ES+  
1.89e6

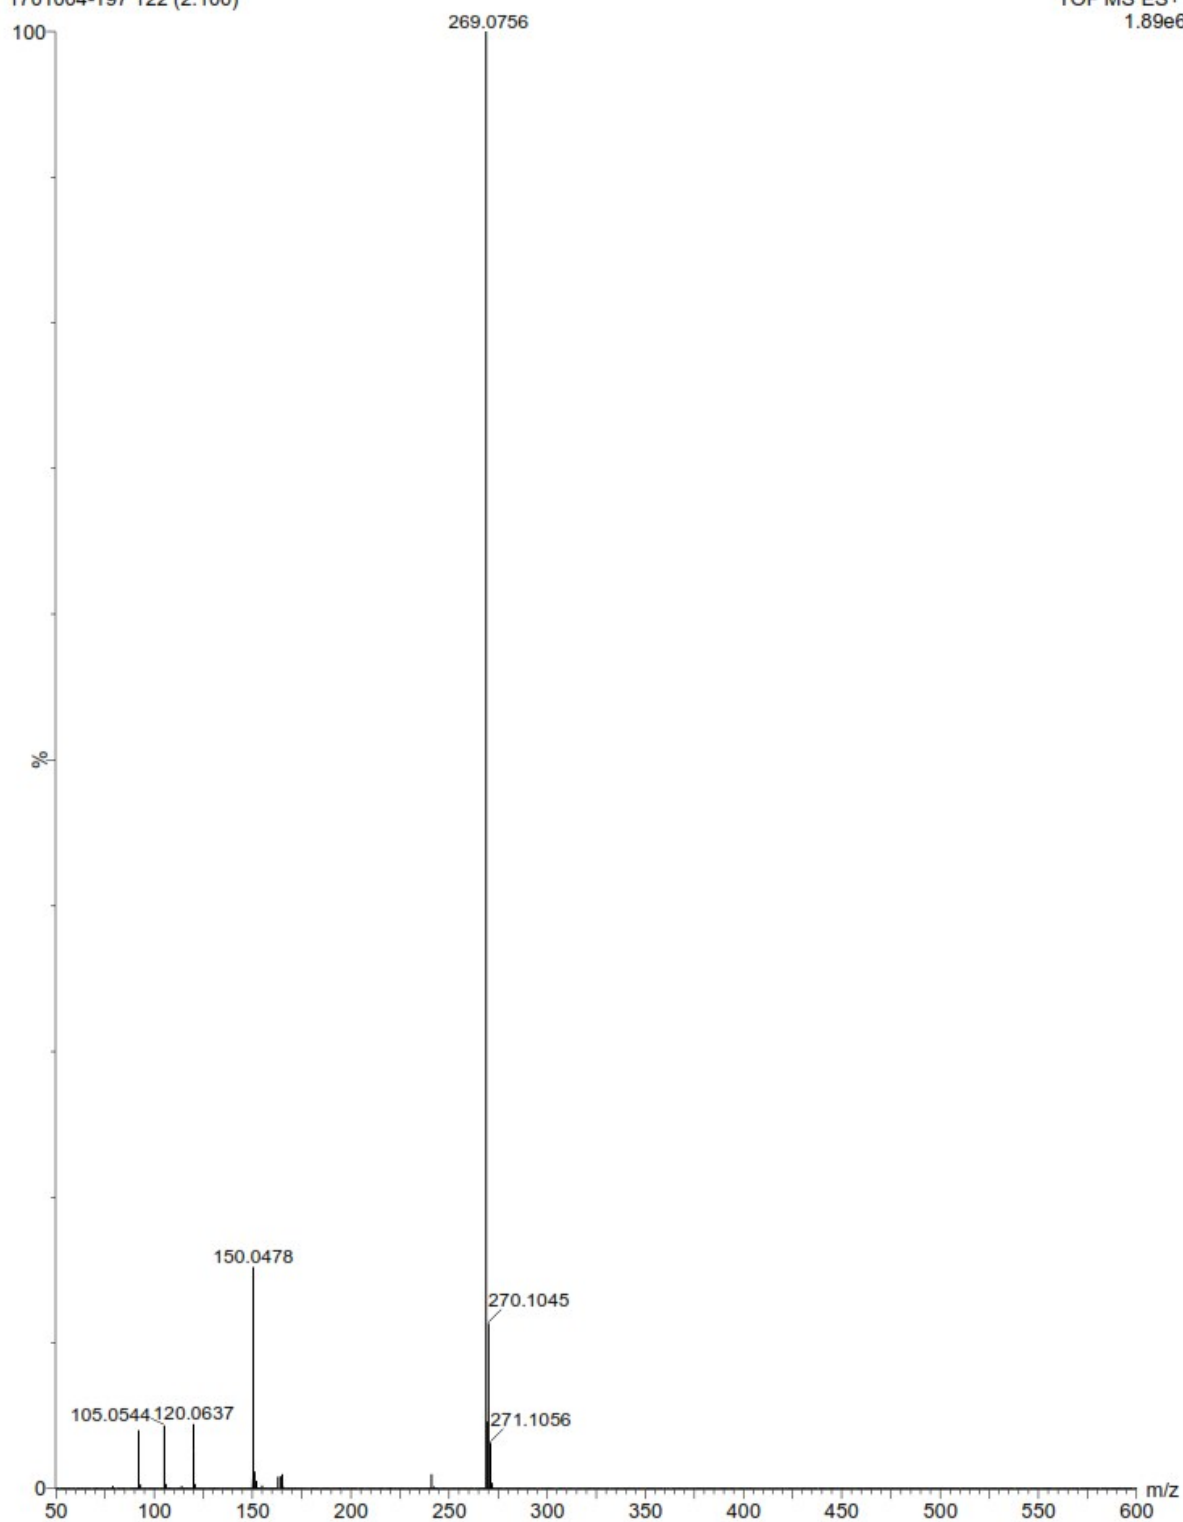

Mass spectra of compound no 23



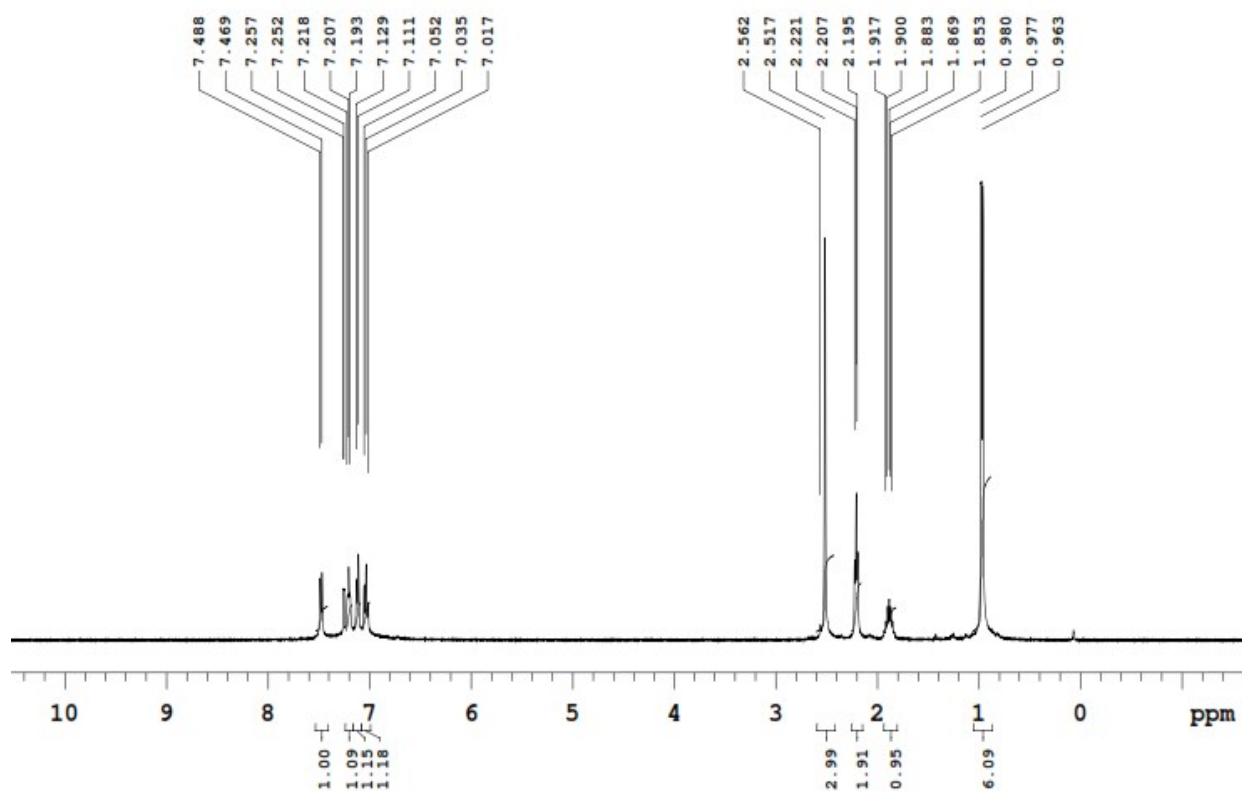

<sup>1</sup>H NMR spectra of compound no 24

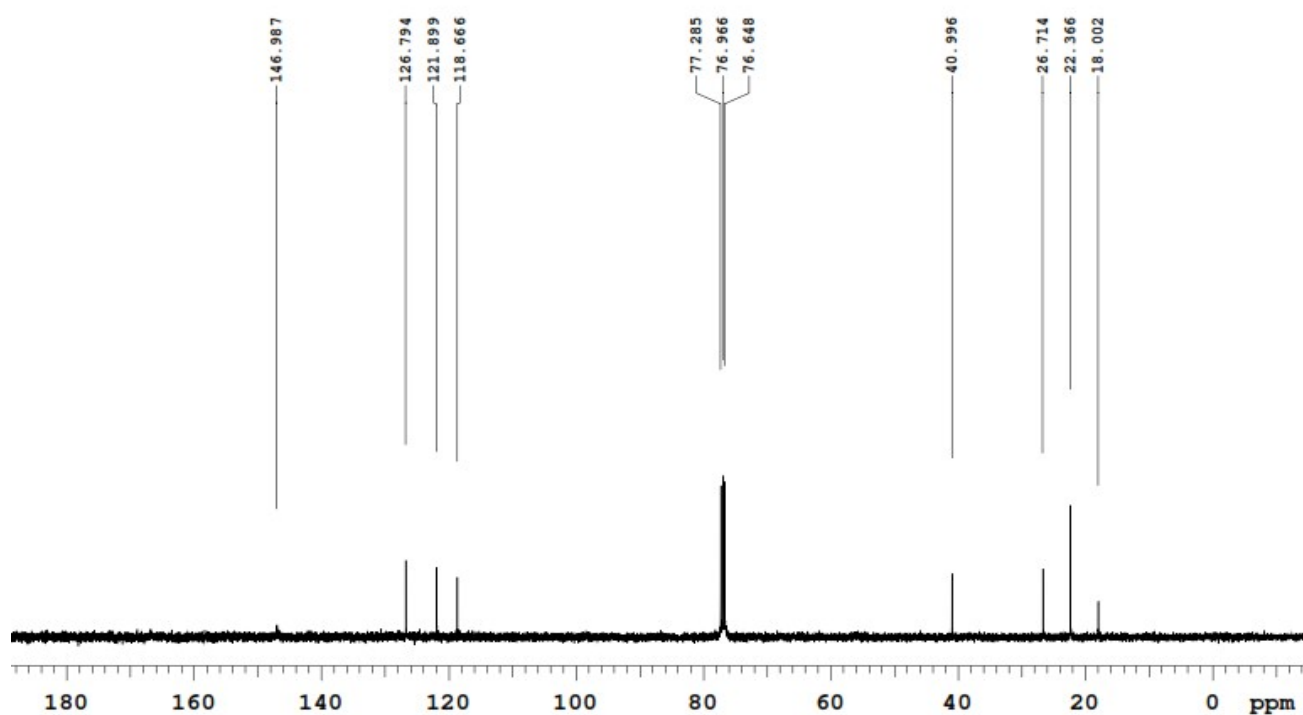

<sup>13</sup>C NMR spectra of compound no 24

1701004-197 562 (2.100)

TOF MS ES+  
1.89e6

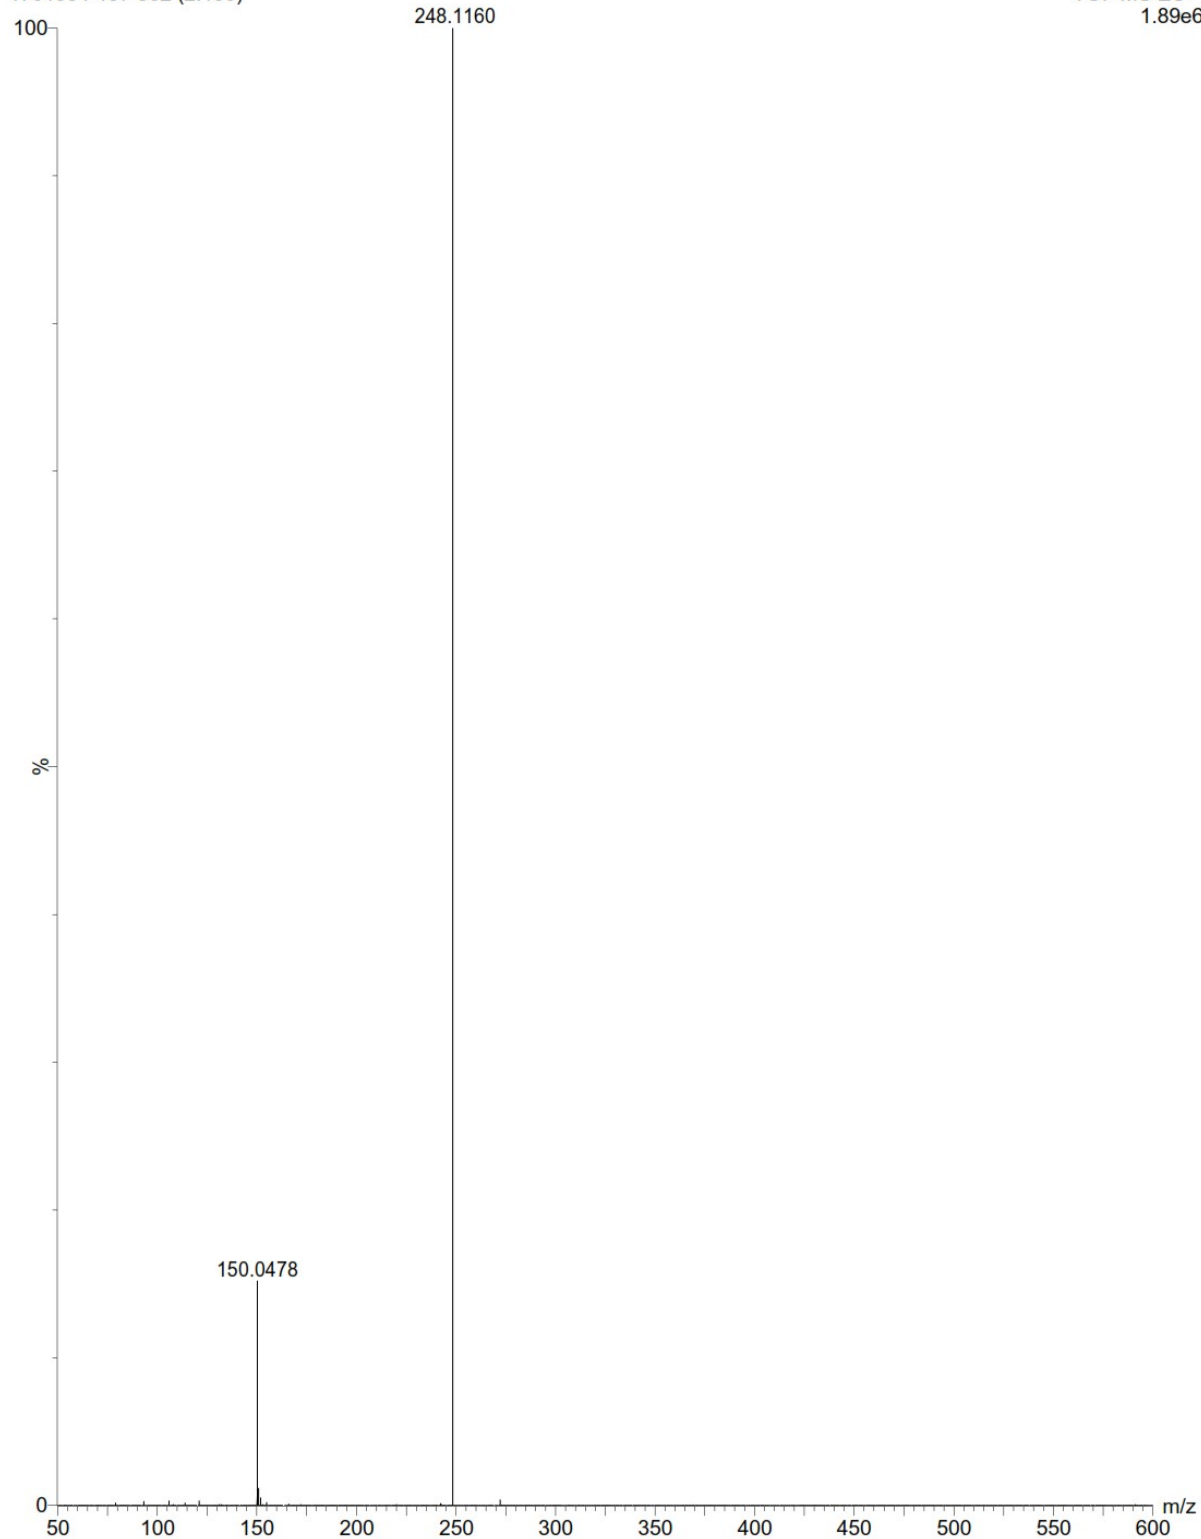

Mass spectra of compound no 24

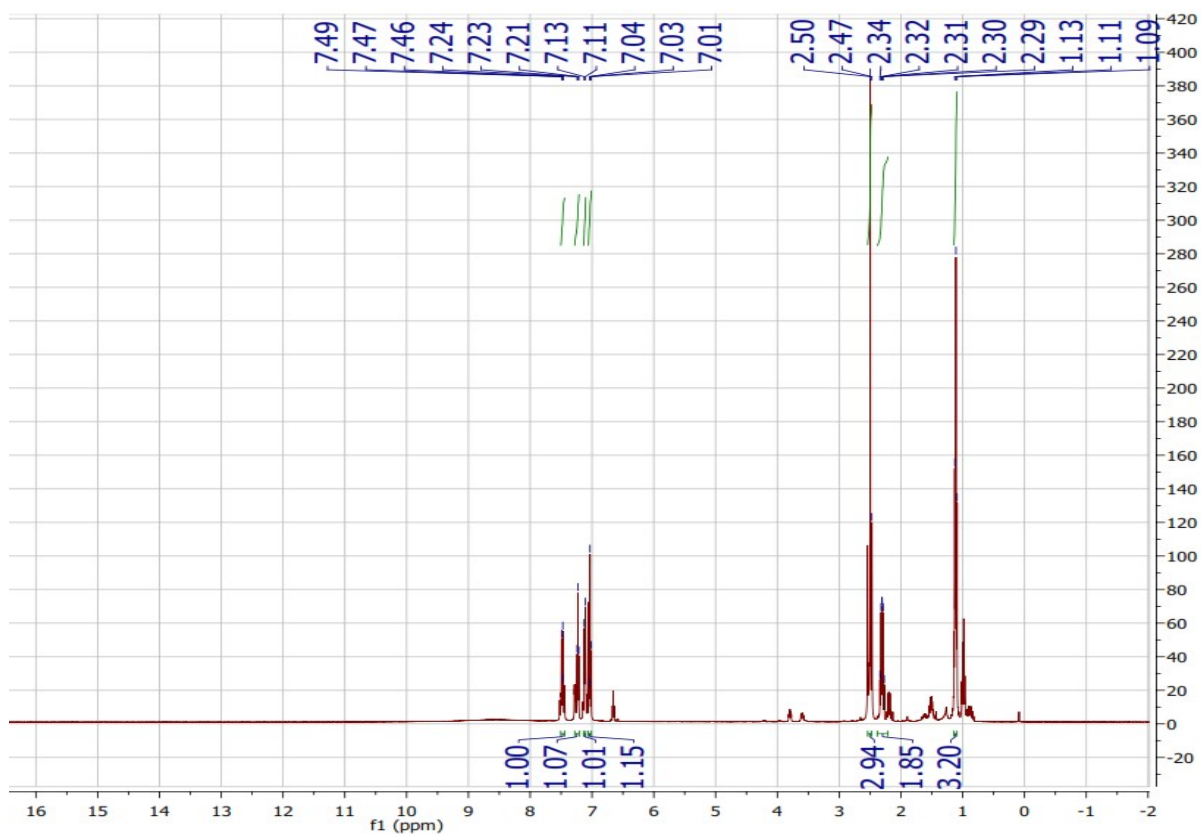

<sup>1</sup>H NMR spectra of compound no 25

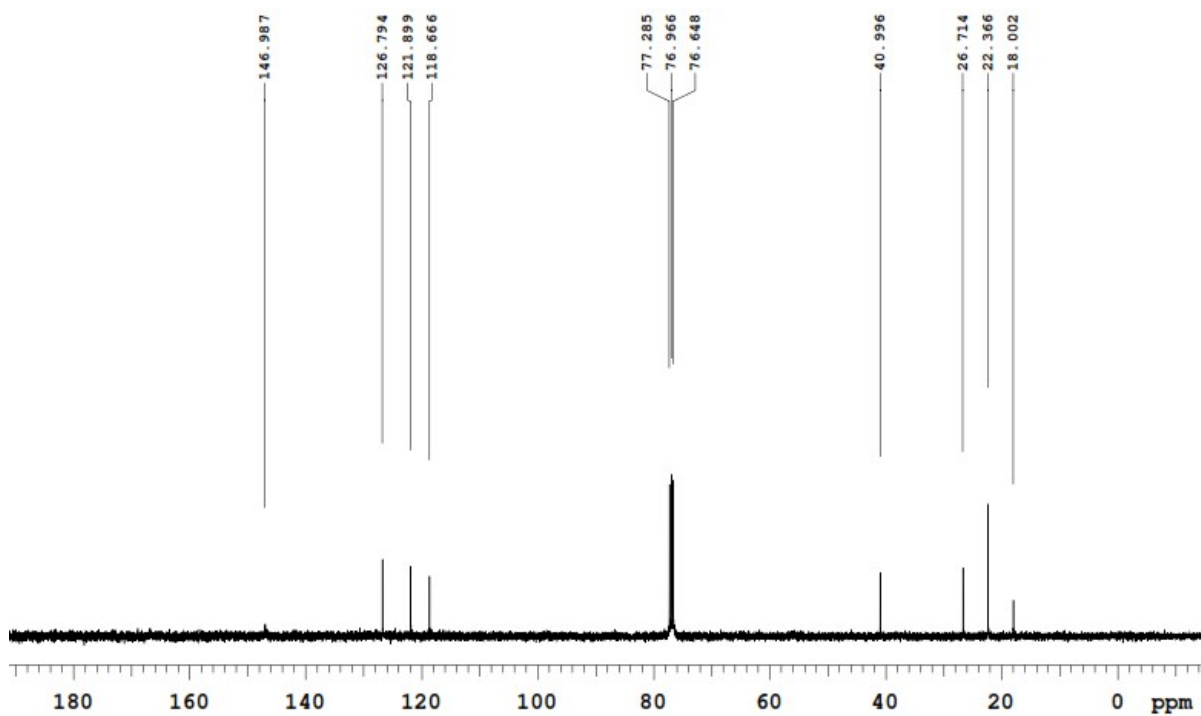

<sup>13</sup>C NMR spectra of compound no 25

1701004-196 181 (3.107)

TOF MS ES+  
2.24e6

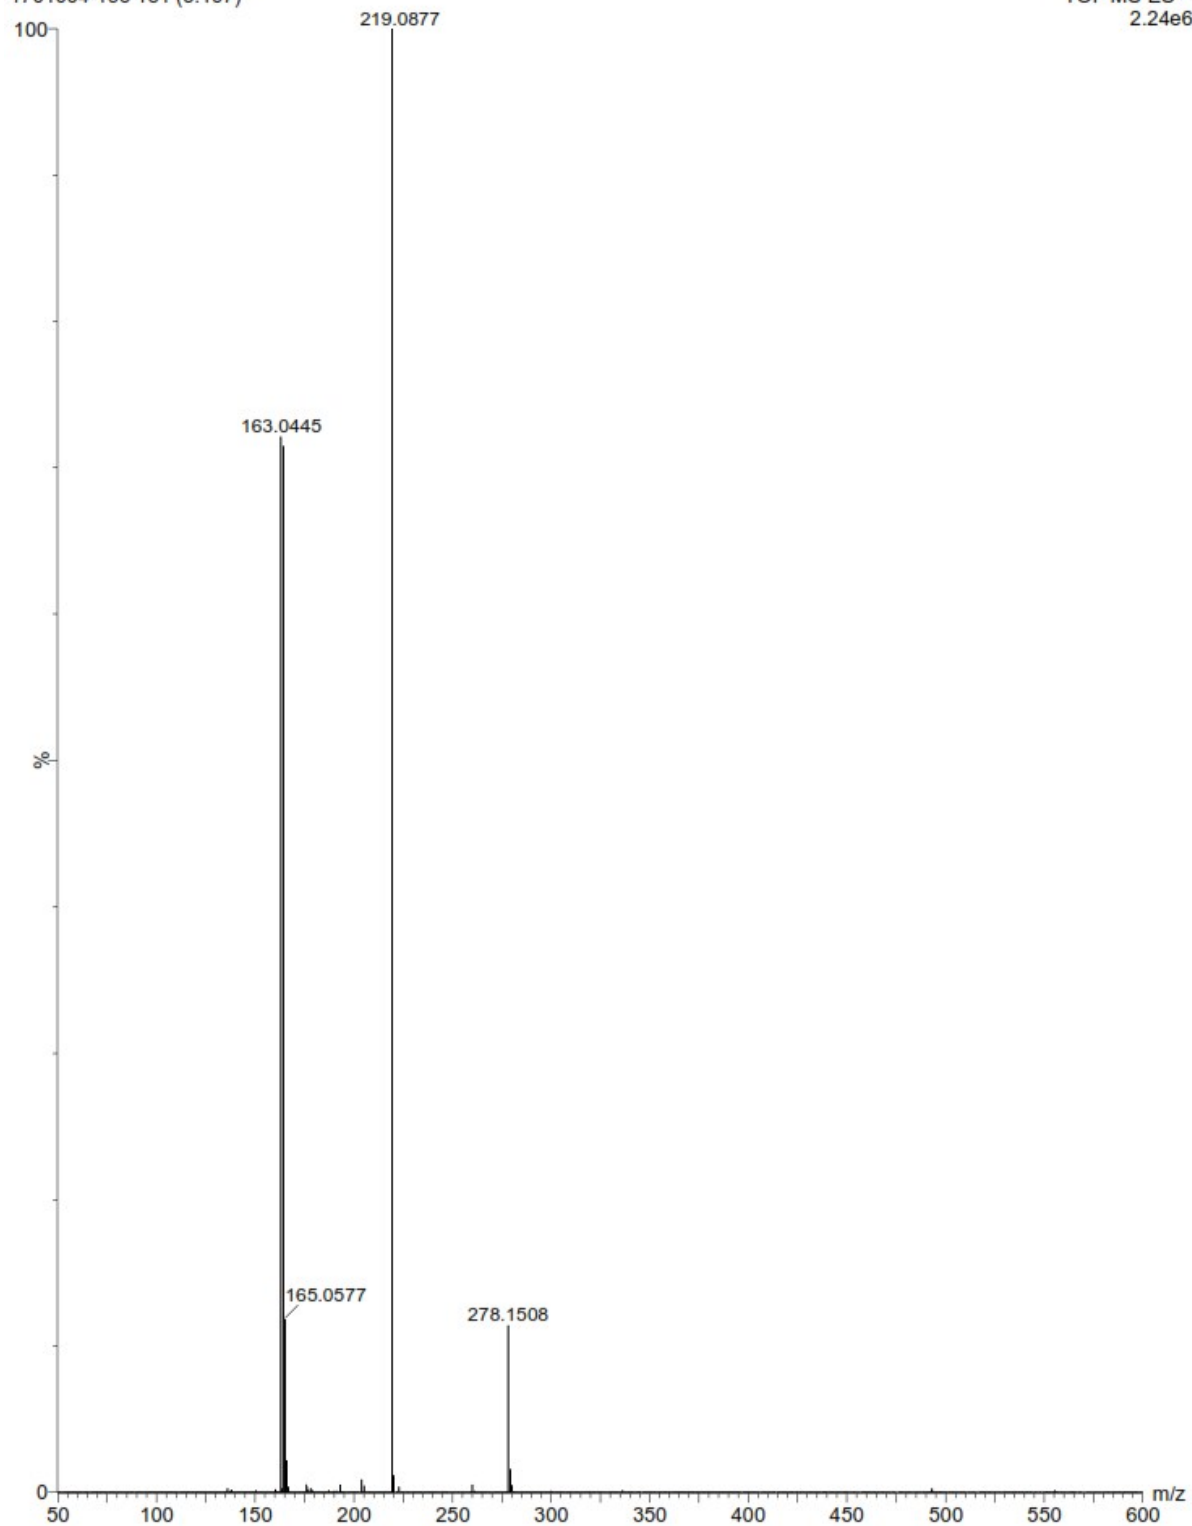

Mass spectra of compound no 25
